1 **Running head**

2 THE AGE OF BUTTERFLIES REVISITED (AND TESTED)

3 **Title**

4 The Trials and Tribulations of Priors and Posteriors in Bayesian Timing of

5 Divergence Analyses: the Age of Butterflies Revisited.

6

7 **Authors**

8 NICOLAS CHAZOT<sup>1\*</sup>, NIKLAS WAHLBERG<sup>1</sup>, ANDRÉ VICTOR LUCCI FREITAS<sup>2</sup>,

9 CHARLES MITTER<sup>3</sup>, CONRAD LABANDEIRA<sup>3,4</sup>, JAE-CHEON SOHN<sup>5</sup>, RANJIT KUMAR

10 SAHOO<sup>6</sup>, NOEMY SERAPHIM<sup>7</sup>, RIENK DE JONG<sup>8</sup>, MARIA HEIKKILÄ<sup>9</sup>

11 **Affiliations**

12 <sup>1</sup>*Department of Biology, Lunds Universitet, Sölvegatan 37, 223 62, Lund, Sweden.*

13 <sup>2</sup>*Departamento de Biologia Animal, Instituto de Biologia, Universidade Estadual de*  
14 *Campinas (UNICAMP), Cidade Universitária Zeferino Vaz, Caixa postal 6109,*  
15 *Barão Geraldo 13083-970, Campinas, SP, Brazil.*

16 <sup>3</sup>*Department of Entomology, University of Maryland, College Park, MD 20742, U.S.A.*

17 <sup>4</sup>*Department of Paleobiology, National Museum of Natural History, Smithsonian*  
18 *Institution, Washington, DC 20013, USA; Department of Entomology and BEES*  
19 *Program, University of Maryland, College Park, MD 20741; and Key Lab of Insect*  
20 *Evolution and Environmental Change, School of Life Sciences, Capital Normal*  
21 *University, Beijing 100048,*

22 <sup>5</sup>*Institute of Littoral Environment, Mokpo National University, Muan, Jeonnam 58554,*

23 *Republic of Korea*

24 <sup>6</sup>*IISER-TVM Centre for Research and Education in Ecology and Evolution (ICREEE),*

25 *School of Biology, Indian Institute of Science Education and Research,*

26 *Thiruvananthapuram, Kerala 695 551, India.*

27 <sup>7</sup>*Instituto Federal de Educação, Ciência e Tecnologia de São Paulo, Campus*

28 *Campinas, CTI Renato Archer - Av. Comendador Aladino Selmi, s/n - Amarais,*

29 *Campinas - SP, 13069-901, Brazil.*

30 <sup>8</sup>*Naturalis Biodiversity Center, Department of Entomology, PO Box 9517, 2300 RA*

31 *Leiden, The Netherlands.*

32 <sup>9</sup>*Finnish Museum of Natural History LUOMUS, Zoology Unit, P.O. Box 17, FI-*

33 *00014 University of Helsinki, Finland.*

34

35 **Corresponding author (\*):**

36 Nicolas Chazot

37 *Department of Biology, Lunds Universitet, Sölvegatan 37, 223 62, Lund, Sweden.*

38 email: [chazotn@gmail.com](mailto:chazotn@gmail.com)

39

40 **Abstract**

41 The need for robust estimates of times of divergence is essential for downstream  
42 analyses, yet assessing this robustness is still rare. We generated a time-calibrated  
43 genus-level phylogeny of butterflies (Papilionoidea), including 994 taxa, up to 10  
44 gene fragments and an unprecedented set of 12 fossils and 10 host-plant node  
45 calibration points. We compared marginal priors and posterior distributions to assess  
46 the relative importance of the former on the latter. This approach revealed a strong  
47 influence of the set of priors on the root age but for most calibrated nodes posterior  
48 distributions shifted from the marginal prior, indicating significant information in the  
49 molecular dataset. We also tested the effects of changing assumptions for fossil  
50 calibration priors and the tree prior. Using a very conservative approach we estimated  
51 an origin of butterflies at 107.6 Ma, approximately equivalent to the Early  
52 Cretaceous–Late Cretaceous boundary, with a credibility interval ranging from 89.5  
53 Ma (mid Late Cretaceous) to 129.5 Ma (mid Early Cretaceous). This estimate was  
54 robust to alternative analyses changing core assumptions. With 994 genera, this tree  
55 provides a comprehensive source of secondary calibrations for studies on butterflies.

56 **Keywords**

57 Papilionoidea, butterflies, time-calibration, fossils, host plants, marginal prior

## 58 INTRODUCTION

59 An increasing amount of molecular information is allowing the inference of broad and  
60 densely sampled phylogenetic hypotheses for species-rich groups. This effort,  
61 combined with the emergence of a great number of methods investigating trait  
62 evolution, historical biogeography, and the dynamics of diversification have increased  
63 the need for time-calibrated trees. Estimating divergence times in molecular  
64 phylogenetic work depends primarily on fossils to constrain models of heterogeneous  
65 rates of substitutions. Consequently, the robustness of such estimates relies on the  
66 quality of fossil information, involving age and taxonomic assignment (Parham et al  
67 2012), the priors assigned to nodes that are calibrated in a Bayesian analysis  
68 (Warnock et al 2012, Brown & Smith 2017), and the amount of information inherent  
69 in the molecular dataset (Yang & Rannala 2006, Rannala & Yang 2007, dos Reis &  
70 Yang 2013).

71 Fossils inform us of the minimum age of a divergence, imposing a temporal constraint  
72 that is widely accepted. However, the constraint of a simple hard minimum age is  
73 insufficient information for a proper analysis of times of divergence, particularly as  
74 there is an absence of information about maximum ages for divergences, including the  
75 root node. Often fossil information is modeled as a probability distribution, such as a  
76 lognormal or exponential distribution, indicating our beliefs regarding how  
77 informative a fossil is about the age of a divergence (Drummond et al 2006, Warnock  
78 et al. 2015). The distributional shapes of these priors are often established without  
79 justification (Warnock et al. 2012). Ideally, in node-based dating, fossil information is  
80 used only as a minimum age constraint for a given divergence in the form of a  
81 uniform prior with a minimum age equaling the fossil age and a maximum age

82 extending beyond the age of the clade in question. In such cases at least one  
83 maximum constraint is needed, often also based on fossil information. Another  
84 approach is use of extraneous additional information, such as using ages of host plant  
85 families as maximum constraints for highly specialized phytophagous insect clades  
86 (Wahlberg et al. 2009). In such cases, a uniform prior also can be used, with the  
87 maximum set to the age of the divergence of the host plant family from its sister  
88 group and the minimum set to the present time.

89 Brown & Smith (2017) recently have pointed out the importance of assessing the  
90 relative influence of priors over the actual amount of information contained in the  
91 molecular dataset. As noted above, users specify fossil calibrations using prior  
92 distributions by modeling the prior expectation about the age of the node constrained.  
93 However, the broader set of fossil constraints can interact with each other and with  
94 the tree prior, leading to marginal prior distributions at nodes that usually differ from  
95 the user's first intention (Warnock et al 2012). If relevant information were contained  
96 within the molecular dataset, one would expect the posterior distribution to shift from  
97 the marginal prior distribution. In the case of angiospermous plants, Brown & Smith  
98 (2017) showed that the marginal prior resulting from the interaction of all priors  
99 (fossils and the tree) excluded an Early Cretaceous origin, in effect giving such an  
100 origin zero probability. In addition, many calibrated internal nodes showed nearly  
101 complete overlap of marginal prior and posterior distributions, suggesting little  
102 information in the molecular dataset but a potentially strong influence of the set of  
103 priors.

104 With more than 18,000 species described and extraordinary efforts made to infer  
105 phylogenetic hypotheses based on molecular data, butterflies (Lepidoptera:

106 Papilionoidea) have become a model system for insect diversification studies.  
107 Nevertheless, the paucity of information available to infer times of divergence in  
108 butterflies questions the reliability of the various estimates (e.g. Garzón-Orduña et al.  
109 2015). Heikkilä et al. (2012) for example, used only three fossils to calibrate a higher-  
110 level phylogeny of the superfamily Papilionoidea. The shortage of fossil information  
111 for calibrating large-scale phylogenies also means that, most of the time, species-level  
112 phylogenies at a smaller scale rely on secondary calibration points extracted from the  
113 higher-level time-trees (e.g. Peña et al. 2011, Matos-Maravi et al. 2013, Kozak et al.  
114 2015, Chazot et al. 2016, Toussaint & Balke 2016).

115 In a recent paper, de Jong (2017) revisited the butterfly fossil record, providing a  
116 discussion about the quality of the different fossil specimens as well as their  
117 taxonomic placement. Using this information, we established an unprecedented set of  
118 12 fossil calibration points across all butterflies, which we use in this study to revisit  
119 the timescale of butterfly evolution in a comprehensive phylogenetic framework, and  
120 investigate the robustness of this new estimate. We complement the minimum age  
121 constraints of clades based on fossils with maximum age constraints based on the ages  
122 of host plant families. Some clades of butterflies have specialized on specific groups  
123 of angiosperm hosts for larval development, such that one may assume that  
124 diversification of the associated butterfly clade only occurred after the appearance of  
125 the host plant clade. We use this assumption as additional information to calibrate the  
126 molecular clock by setting the age of specific clades of butterflies to be younger than  
127 the estimated age of their host plant lineage. We restrained these calibrations to  
128 higher-level host plant clades.

129 The most recent estimates of divergence times using representatives of all butterfly  
130 families inferred a crown clade age of butterflies of 110 Ma (Heikkilä et al. 2012) and  
131 104 Ma (Wahlberg et al. 2013). These two dates yield to a large discrepancy when  
132 taking the fossil record into account, as the oldest known fossil butterfly is estimated  
133 to be 55.6 Ma and can be confidently assigned to the extant family HesperIIDae (de  
134 Jong 2016, 2017). Such discrepancy has been extensively debated for a similar case,  
135 the origin of angiosperms, often estimated to have originated during the Triassic (252-  
136 –201 Ma ago), while the oldest undisputed fossil is pollen dated at 136 Ma. Despite a  
137 much more fragmentary fossil record for butterflies, the same questions remain. First,  
138 are the previous estimates robust to a more comprehensive assemblage of fossils and  
139 taxon sampling? Second, is the 50 million-year discrepancy between molecular clock  
140 estimates and the fossil record accurate or the result of a lack of information  
141 contained in the molecular dataset? In other words, how much does the set of priors  
142 influence the results?

143 Here, we generated a genus-level phylogeny of Papilionoidea, including 994 taxa, in  
144 order to maximize the number and position of fossil calibration points and increase  
145 the potential amount of molecular information. By establishing the set of 12 fossils  
146 and 10 host-plant calibration points, we time-calibrated the tree in order to provide a  
147 revised estimate of the timing in diversification of butterflies. We then assessed the  
148 robustness of these results to the assumptions made throughout the analysis, including  
149 (i) different subsets of fossil constraints, (ii) the prior distributions of fossil constraints,  
150 (iii) a different estimate for host plant ages, (iv) a Yule tree prior, (v) a reduced taxon  
151 sampling and (vi) the addition of a mitochondrial gene fragment to the nine nuclear  
152 gene regions.

153 Finally, we compared the user specified priors, marginal prior and posterior  
154 distributions of different analyses, to assess the influence of our set of constraints on  
155 the estimated timing of divergence.

156

## 157 **MATERIALS AND METHODS**

### 158 *Molecular Dataset*

159 When designing our dataset, we aimed at building a genus-level tree of Papilionoidea.  
160 We assembled a dataset of 994 taxa from the database VoSeq  
161 (<http://www.nymphalidae.net/db.php>, Peña & Malm 2012), with each taxon  
162 representing a genus. We chose to include gene fragments that were available across  
163 the whole tree in order to avoid large clade-specific gaps in the molecular dataset. In  
164 addition, Sahoo et al. (2016) pointed out a conflicting signal in the family Hesperidae  
165 between nuclear and mitochondrial markers. Thus, we chose to primarily focus on  
166 nuclear markers. Our final dataset included nine gene fragments: ArgKin (596bp),  
167 CAD (850bp), EFI- $\alpha$  (1240 bp), GAPDH (691bp), IDH (710 bp), MDH (733 bp),  
168 RPS2 (411 bp), RPS5 (617 bp) and wingless (412 bp) for a total length of 6260 base  
169 pairs. The list of taxa and Genbank accession codes are available in the  
170 Supplementary Material S1.

### 171 *Set of Time-Calibrations for Timing Analyses*

172 Fossil calibrations – Previous studies estimating times of divergence of butterfly  
173 lineages have largely relied on unverified fossil calibrations. The identifications of  
174 these calibrations were often based on overall similarity with extant taxa, not  
175 apomorphies. In the present study, we initially chose 14 fossil butterflies that were



176 recently critically reviewed by de Jong (2017) and displayed apomorphic characters  
177 or character combinations diagnostic of extant clades, thereby allowing reliable  
178 allocation of fossils on the phylogenetic tree to provide minimum ages to the  
179 corresponding nodes. These fossils included three inclusions in Dominican Amber  
180 and 11 compression/impression fossils. For the age of these fossils we have relied on  
181 the most recent dates established from recent advances in Cenozoic  
182 chronostratigraphy, geochronology, chemostratigraphy and the geomagnetic polarity  
183 time scale (Walker et al., 2013). These improvements by geologists and specialists in  
184 allied disciplines have provided an increased precision in age dates of stratigraphic  
185 record (International Commission on Stratigraphy, 2012). The list of fossils and their  
186 positions in the tree is given in Table 1 and Figure 1. For more detailed information  
187 on the identification of these fossils, localities, preservation type and current  
188 depositories, see de Jong (2017).

189 When a fossil was assigned to a clade, we calibrated the stem age of this clade,  
190 specifically the time of divergence from its sister clade, instead of the crown age or  
191 the first divergence event recorded in the phylogeny. As a consequence of this choice,  
192 we removed two of the 14 fossils. We did not use *Praepapilio colorado* Durden &  
193 Rose, 1978 (Papilionidae, 48.4 Ma) nor the less well-preserved *Praepapilio gracilis*  
194 Durden & Rose, 1978 (Papilionidae) of the same age because its position at the root  
195 of the tree was uninformative given the presence of the 55.6 million years old  
196 *Protocoeliades kristenseni* de Jong, 2016 placed at the crown of the Hesperidae. For  
197 similar reasons, we did not use *Doxocopa wilmattae* Cockerell, 1907  
198 (Nymphalinae+Biblidinae+Limenitidinae+Apaturinae, 33.8 Ma) because its position  
199 was uninformative given the presence of *Vanessa amerindica* Miller & Brown, 1989  
200 of the same age but placed lower in the tree.

201 Host plant calibrations – Butterflies are well known for their strict relationships with  
202 specific groups of plants used by their larvae. Such associations have previously been  
203 suggested as evidence for coevolution (Ehrlich & Raven, 1964, Janz & Nylin 1998,  
204 Nylin & Janz 1999). In the present study, we selected nine calibration points based on  
205 known information of host plant specificity by butterflies since the large revision of  
206 Ackery (1988) (see also Beccalloni et al. 2008 for Neotropical species), and revised  
207 for those host plant records listed as having spurious or occasional records (AVLF  
208 unpublished data). Host plant clades used by single genera or a small group of  
209 recently-derived genera were discarded, such as the use of Aristolochiaceae by  
210 Troidini. In these cases the butterflies clearly are much more recent than their  
211 associated plant clades, and consequently do not contribute relevant time information  
212 to the tree. The ages of each plant group were defined as maximum ages for the  
213 respective nodes (Table 1). For all host plant maximum constraints we used the  
214 estimate from Magallón et al. (2015) using the upper boundary of the 95% credibility  
215 interval of the stem age of the host plant clade. We also constrained the root of the  
216 Papilionoidea with a maximum age corresponding to the crown age of angiosperms  
217 from Magallón et al. (2015). The host plant calibrations were placed at the crown of  
218 the butterfly clades as a conservative approach since we do not know when the host  
219 plant shift occurred on the stem branch. However, we assume that the diversification  
220 of the clade could not have begun earlier than the origin of the host plant family.

221

## 222 *Analyses Overview*

223 Given computational limitations for such a large dataset, we adopted the following  
224 procedure (details given below). We ran PartitionFinder v. 1.1 (Lanfear et al. 2012) to

225 identify the best partition scheme. Using this result we performed a maximum  
226 likelihood analysis to obtain a tree topology. This tree topology was transformed into  
227 a time-calibrated ultrametric tree and used thereafter as a fixed topology and starting  
228 tree in all our dating analyses. Branch lengths were estimated using BEAST v. 1.8.3  
229 (Drummond et al. 2012) with a simpler partitioning scheme, a birth-death tree prior,  
230 lognormal relaxed molecular clocks, and a combination of minimum (fossils) and  
231 maximum (host plants) constraints for which all were set with uniform priors. This  
232 constituted the core analysis. We then performed additional analyses to test the  
233 robustness of our results to (i) different subsets of fossil constraints, (ii) the prior  
234 distribution of fossil constraints, (iii) a different estimate for host-plant ages, (iv) a  
235 Yule tree prior, (v) a reduced taxon sampling, and (vi) the addition of a mitochondrial  
236 gene fragment.

237

### 238 *Core Analysis*

239 Tree topology – We started by running PartitionFinder v. 1.1 (Lanfear et al. 2012) on  
240 the concatenated dataset, allowing all possible combinations of codon positions of all  
241 genes. Substitution models were restricted to a GTR+G model and branch lengths  
242 were linked. We then performed a maximum likelihood analysis using RAxML v8  
243 (Stamatakis 2006) using the best partitioning scheme identified by PartitionFinder and  
244 1000 ultrafast bootstraps. The resulting tree was set as a fixed topology for the dating  
245 analyses. To do so, the tree was transformed into a time-calibrated ultrametric tree  
246 using the package *ape* (Paradis et al. 2004) and all minimum and maximum  
247 constraints in order to obtain a starting tree suitable for BEAST analyses.

248 Time tree – We used BEAST v. 1.8.3 (Drummond et al. 2012) to perform our time-  
249 calibration analysis. Given the size of our dataset, we reduced the number of  
250 partitions in our dating analysis to three partitions, each partition being one codon  
251 position of all genes pooled together. Substitution rate for each partition was modeled  
252 by GTR+G and an uncorrelated lognormal relaxed molecular clock. We used a Birth-  
253 Death process as branching process prior. In order to have a fixed topology we turned  
254 off the topology operators in BEAUTi and we specified the topology obtained with  
255 RAxML made ultrametric with the *ape* package.

256 Setting the priors for calibration points is always an important matter of discussion.  
257 Non-uniform priors are often used, yet in the majority of studies the choice of  
258 parameters defining the shape of the prior distribution is not justified (Warnock et al.  
259 2012). For the core analysis we followed a conservative approach – considering that  
260 fossils only provide a minimum age, while host plant calibrations only provide a  
261 maximum age for the nodes they were assigned to – and we used uniform prior  
262 distributions for all calibration points (Table 1). When a node was calibrated with  
263 fossil information, the distribution ranged from the estimated age of the fossil to the  
264 age of angiosperm origin (extracted from Magallón et al. 2015). When a node was  
265 calibrated using host-plant age, the prior distribution ranged from 0 (present) to the  
266 age of the host plant clade origin. When a node was calibrated with both types of  
267 information, the distribution ranged for the age of the fossil to the age of host plant  
268 clade origin. We also used a uniform prior for the tree root height, ranging between  
269 the oldest fossil used in the analysis and the age of angiosperm origin. Host plant  
270 calibrations, as well as the origin of angiosperms were extracted from Magallón et al.  
271 (2015), using the upper boundary of the 95% credibility interval of the stem age of the  
272 host plant clade. Our choice of combining (1) uniform prior distributions, (2) fossil

273 calibration of stem nodes, (3) the oldest stem age of the host plant clades and (4) host  
274 plant calibration of crown nodes has important implications. On the one hand these  
275 choices are the most conservative options, cautiously using the information given by  
276 each type of calibration point and taking into account uncertainty surrounding the  
277 information used. On the other hand, they are also the least informative.

278 We performed four independent runs of 30 million generations, sampling every 30  
279 000 generations. We checked for a satisfactory convergence of the different runs  
280 using Tracer v. 1.6.0 (Rambaut et al. 2014) and the effective sample size values in  
281 combination. Using LogCombiner v. 1.8.3 (Drummond et al. 2012), we combined the  
282 posterior distributions of trees from the three runs, discarding the first 100 trees (10%  
283 burn-in) of each run. Using TreeAnnotator v. 1.8.3 (Drummond et al. 2012) we  
284 extracted the median and the 95% credibility interval of the posterior distribution of  
285 node ages.

286

### 287 *Alternative Analyses*

288 We tested the effect of making alternative choices along the core analysis on our  
289 estimates of divergence times. Unless stated otherwise, we made only one  
290 modification at a time; all other parameters remained identical to that described for  
291 the core analysis. We performed at least two independent runs of 30 million  
292 generations per alternative parameter set and more if convergence was not reached.

293       Different subset of fossils – We aimed at testing whether using only a fraction  
294 of the fossil information affected the estimation of divergence times and whether the  
295 position of calibrations (close to the root or close to the tips) also changed the results.

296 Thus, we divided our set of fossil constraints into two subsets depending on their  
297 position in the tree. One subset included fossil calibration points assigned at a deep  
298 level in tree (hereafter: higher-level fossils): *Lethe*, *Mylothrites*, *Neorinella*,  
299 *Pamphilites*, *Prolibythea*, *Protocoeliades* and *Vanessa* (Table 1). The other subset  
300 included fossil calibration points close to the tips of our phylogeny (hereafter: lower-  
301 level fossils): *Doritites*, *Thaites*, *Dynamine*, *Theope* and *Voltinia* (Table 1). In both  
302 cases the full set of maximum constraints was used. We performed one analysis for  
303 each subset.

304 Exponential fossil priors – In the core analysis we used uniform distributions  
305 for calibration points, which is a conservative option but also the least informative. As  
306 an alternative, we designed exponential priors for fossil calibration points.  
307 Exponential priors use the age of a fossil as minimum age for the node it has been  
308 assigned to, but also assume that the probability for the age of the node decreases  
309 exponentially as time increases. In BEAUTi, we set the offset of exponential  
310 distributions with the age of the fossil. The distribution was truncated at the maximum  
311 age used in the uniform priors. The shape of the exponential distribution is controlled  
312 by a mean parameter, which has to be arbitrarily chosen by the users. The choice of  
313 mean parameter can be found in Table 1. Priors for host plant calibration points were  
314 not changed (i.e., uniform priors).

315 Alternative host plant ages –The origin and timing of diversification of  
316 angiosperms is controversial. While the oldest undisputed fossil of Angiospermae is  
317 from the early Cretaceous (136 Ma, Brenner 1996), most divergence time estimations  
318 based on molecular clocks have inferred a much older origin. In the core analysis, we  
319 chose to use host plant ages derived from the tree of angiosperms time-calibrated by

320 Magallón et al. (2015), who imposed a constraint on the origin of angiosperms based  
321 on this fossil information. They found a crown age for angiosperms of ~ 140 Ma. As  
322 an alternative consistent with an older origin of angiosperms we used ages recently  
323 inferred by Foster et al. (2017), who recovered a crown age of angiosperms of ~ 209  
324 Ma. All maximum constraints were replaced by those inferred by Foster et al. (2017).  
325 The origin of angiosperms was used as a maximum constraint was set to the upper  
326 boundary of the 95% credibility interval of the crown age of the angiosperms i.e.,  
327 252.8 Ma. Because the posterior distributions of node ages for this analysis were very  
328 skewed, we extracted the median of the distribution, the 95 % credibility interval and  
329 the mode of the kernel density estimate of nodes using the R package *hdr kde*. For  
330 comparison, we also estimated the mode of posterior distributions for the core  
331 analysis and all alternative tests.

332 Yule branching process prior – Condamine et al. (2015) showed that the prior  
333 for the tree growth can have a great impact on the estimated divergence times. In the  
334 core analysis we used a Birth–Death prior, which models the tree formation with a  
335 constant rate of lineage speciation and a constant rate of lineage extinction. As an  
336 alternative, we used a Yule prior, which involved a constant rate of speciation and no  
337 extinction to assess whether age estimates changed or not.

338 Reduced dataset – In our core analysis, we chose to maximize the taxon  
339 sampling – increasing the number of lineages – which increased the fraction of  
340 missing data in the molecular dataset. We tested whether increasing the molecular  
341 dataset completion to the detriment of taxon sampling changed the results. In this  
342 reduced dataset, we included all the genera for which a specific minimum number of  
343 genes were available. The missing data in the molecular dataset are not uniformly

344 distributed across the tree; for example, Lycaenidae have more missing data than the  
345 Nymphalidae. Therefore, a different cut-off value was chosen for each family in order  
346 to keep a good representation of the major groups (Papilionidae: 5 genes, Hedyliidae:  
347 8 genes, Hesperidae: 9 genes, Pieridae: 8 genes, Lycaenidae: 4 genes, Riodinidae: 8  
348 genes, Nymphalidae: 9 genes). In order to allow assignment of all fossils to the same  
349 place as in the core analysis, nine taxa having a number of genes below the cut-off  
350 value had to be added. We ended up with a dataset reduced to only 364 taxa instead of  
351 994 in the core analysis. Accordingly, the fraction of missing data decreased from  
352 39.5% in the core analysis to 21.4%. Given this important modification of the dataset  
353 we generated a new topology with RAxML, which was then calibrated identically to  
354 the core analysis.

355           Mitochondrial gene fragment – We tested whether adding mitochondrial  
356 information in the dataset would affect our results. To do so, we added the  
357 cytochrome-oxidase-subunit 1 gene to the molecular dataset. Given the conflicting  
358 signal in Hesperidae between nuclear and mitochondrial information (Sahoo et al.  
359 2016), the COI was not added to the Hesperidae. We performed a new RAxML  
360 analysis in order to obtain a new topology. This new tree was calibrated with BEAST  
361 identically to the core analysis, with one difference. The mitochondrial gene was  
362 added as two partitions separated from the nuclear partitions: the first and second  
363 positions of COI were pulled together and the third position had its own partition.  
364 Therefore this analysis had five partitions.

365

366 *Comparing Prior and Posterior Distributions*



367 When performing a Bayesian analysis, comparing prior and posterior parameter  
368 distributions can be informative about the amount of information contained by our  
369 data compared to the influence of prior information. As exemplified by Brown &  
370 Smith (2017), such a comparison can shed light on the discrepancies observed in the  
371 fossil record and the divergence times estimated from a time-calibrated molecular  
372 clock. It may also help to disentangle the effect of interaction among calibration  
373 points. For each calibrated node we can compare the user-designed prior distribution  
374 (e.g., uniform distributions in the case of the core analysis), the marginal prior  
375 distribution that is the result of the interaction between the user priors and the tree  
376 prior, and the posterior distribution that is the distribution after observing the data.

377 For the core analysis, the two different subsets of fossils and the alternative host plant  
378 ages analyses were re-run without any data to sample from the marginal prior. In each  
379 case we performed two independent runs of 50 million generations, sampling every  
380 50 000 generations. The results were visualized with Tracer. When necessary, we  
381 performed an additional run. Using LogCombiner, the runs were combined after  
382 deleting the first 10% as burn-in. The results of the analyses with and without the  
383 molecular dataset were imported into R (R Development Core Team 2008) and for  
384 each calibrated node as well as the root height we compared the kernel density  
385 estimates of the marginal prior and the posterior distributions (R package *hdcde*).

### 386 *Comparison with Previous Studies*

387 For the root of all Papilionoidea and the seven families we compared the estimates  
388 obtained in the core analysis to previous studies that also used fossil information.

389

390 **RESULTS**

391 *Core Analysis*

392 The core analysis performed with BEAST used the full set of fossils and host plant  
393 constraints from Magallón et al. (2015) on the topology found with RAxML. This  
394 analysis resulted in a root estimate for all Papilionoidea of 107.6 Ma (Fig. 1,  
395 Supplementary Material S2). The 95% credibility interval of the posterior distribution  
396 ranged from 88.5 to 129.5 Ma. The lineage leading to Papilionidae diverged first at  
397 the root of Papilionoidea and the crown age of Papilionidae was inferred to be 68.4  
398 Ma (95%CI=53.5–84.3). Hedyliidae and Hesperiiidae diverged from Pieridae–  
399 Lycaenidae–Riodinidae–Nymphalidae at 106.5 Ma (95%CI=88.0–127.2) and  
400 diverged from each other at 99.2 Ma (95%CI=80.7–119.2). The crown age of the  
401 sampled Hedyliidae was 32.8 Ma (95%CI=23.4–43.6) and crown age of Hesperiiidae  
402 was 65.2 Ma (95%CI=55.8–78.1). Pieridae diverged from Lycaenidae–Riodinidae–  
403 Nymphalidae at 101.1 Ma (95%CI=83.0–120.3) and extant lineages started  
404 diversifying around 76.9 Ma (95%CI=63.1–92.4). Lycaenidae and Riodinidae  
405 diverged from Nymphalidae at 97.4 Ma (95%CI=80.4–116.5) and diverged from each  
406 other at 87.8 Ma (95%CI=73.2–106.1). The crown age of Lycaenidae was 71.0 Ma  
407 (95%CI=57.2–85.2) and crown age of Riodinidae was 73.4 Ma (95%CI=60.3–88.1).  
408 Finally, the crown age of Nymphalidae was inferred to be 82.0 Ma (95%CI=68.1–  
409 98.3).

410

411 *Alternative Analyses*

412 In most cases the seven alternative parameters tested yielded very similar results (Fig.  
413 2, Supplementary Material S3-S8). Reducing the number of taxa in order to decrease  
414 the fraction of missing data, using higher-level calibration points only, or using a Yule  
415 process tree prior (instead of a Birth–Death prior), gave virtually identical results as  
416 the core analysis above. Using only lower-level fossil constraints (close to the tips of  
417 the phylogeny) resulted in the youngest estimates of all alternative runs, with a crown  
418 age of Papilionoidea of 94.5 Ma (mode=83.8, 95%CI=67.8–126.6). Using exponential  
419 fossil priors mainly resulted in a narrower credibility interval, while the mode and  
420 median age estimates were only 7–8 million years younger than the core analysis  
421 mode estimate (Fig. 2, Supplementary Material S6). Adding mitochondrial  
422 information also lead to a 7–8 million-year younger estimate for the crown age of  
423 Papilionoidea, but the credibility interval remained comparable to the core analysis  
424 (Supplementary Material S7). Finally, using a hypothesis of older host plant ages  
425 extracted from Foster et al. (2017), we obtained the greatest difference. The upper  
426 boundary of the credibility interval largely shifted toward much older ages (95%CI  
427 I=88.5–167.2) as well as the median (119.5 Ma). The posterior distribution was,  
428 however, very skewed, with a mode of 101.0 Ma, and converged to the same age as  
429 the core analysis (Fig. 2, Supplementary Material S8).

430 These variations for the root age among different alternative analyses were recovered  
431 for the ages of the different subfamilies. For example, all lower-level fossils always  
432 led to younger estimates while older ages from Foster et al. (2017) always led to older  
433 estimates (Fig. 2).

434 *Comparing Prior and Posterior Distributions*

435 We compared the posterior distributions to the marginal prior distributions for the  
436 different calibrated nodes in the core analysis. We set all fossil and host plant  
437 constraints with uniform prior distributions as we considered this as the most  
438 conservative approach. However, it is important to note that the marginal prior  
439 distributions at these nodes, which result from the interactions between all calibration  
440 priors and tree prior, are not uniform (Fig. 3).

441 Across all calibrated node points, many of them showed shifts of posterior  
442 distributions from the marginal priors, indicating that the results of the core analysis  
443 was not a simple outcome of our set of priors (Fig. 3). Interestingly, the nodes  
444 calibrated by *Doritites*, *Dynamine*, *Thaites*, *Theope* and *Voltinia*, which are all the  
445 fossils placed close to the tips of our phylogeny, tended to shift away from the  
446 minimum boundary, toward older ages than the marginal prior distribution.  
447 Alternative analyses performed with only these lower-level fossils yielded the  
448 youngest tree for butterflies. This suggests that higher-level fossils bring important  
449 additional information, leading posterior distributions of lower-level nodes to shift  
450 away from the prior distributions in the core analysis.

451 The nodes calibrated with the higher-level fossils *Mylothrites*, *Prolibythea*, *Neorinella*  
452 and *Vanessa* showed posterior distributions largely overlapping with their marginal  
453 prior distributions. Many host plant calibrated points showed a shift from the marginal  
454 prior distribution (Fig. 3). In all cases, except the node also calibrated with the fossil  
455 *Lethe* the crown age of the butterfly clade inferred was much younger than the age of  
456 the corresponding host plant clade.

457 For the root of Papilionoidea, the marginal prior and posterior distributions largely  
458 overlapped in the core analysis, therefore not indicating whether our molecular

459 dataset contained significant information about the root age or not. We also compared  
460 the posterior and the marginal prior distributions for alternative analyses performed  
461 with different subsets of fossil calibrations (Fig. 4). When using only higher-level  
462 fossils, the posterior distribution was almost identical to the core analysis, but the  
463 marginal prior slightly shifted from the marginal prior of the core analysis toward a  
464 younger age. The use of only lower-level fossils had more profound effects. In such a  
465 case, prior distributions of the core analysis and the lower-level fossils alternative  
466 completely overlapped. The posterior distribution, however, shifted toward younger  
467 ages, yielding the most recent estimate for the root age among all analyses  
468 (mean=94.5, mode=83.8, 95%CI=67.8–126.5). We also looked at the effect of using  
469 relaxed maximum ages (based on Foster et al. 2017). In this case, marginal prior  
470 distribution for the root age shifted to a mean of ~148 Ma (Fig. 4) and a credibility  
471 interval spanning 100 Ma (95%CI=99.9–205.8). The posterior distribution was very  
472 skewed, retaining a wider credibility interval than the core analysis (95%CI=88.5–  
473 167.5), but significantly shifted from the prior distribution toward the posterior  
474 distribution of the core analysis (median=119.5, mode=101.0).

#### 475 *Comparison with Previous Studies*

476 For the root of Papilionoidea, our estimate in the core analysis using the mode age of  
477 the distribution was very similar to Wahlberg et al. (2013) and Heikkilä et al. (2012),  
478 with a mean age estimate of 104.6 and 110.8 Ma, respectively (107.6 Ma in the core  
479 analysis, Fig. 5). For the crown age of families our estimates were often consistent  
480 with most of previous studies. For Papilionidae, our crown age estimate (68.4,  
481 95%CI=53.5–84.3) was very similar to Wahlberg et al. (2013) and Heikkilä et al.  
482 (2012), while Condamine et al. (2012) in a study focusing primarily on this family

483 found younger ages of about 15 million years. For Hedyliidae, only the study by  
484 Heikkilä et al. (2012) had an estimate for the crown age, whose mean age was 45.3  
485 Ma, which is older than our result (32.8, 95%CI=23.4–43.6). The age of Hesperiiidae  
486 (65.2, 95%CI=55.8–78.1) was similar to Wahlberg et al. (2013) and Heikkilä et al.  
487 (2012), but much younger than Sahoo et al. (2017) with an estimate of 82 Ma.  
488 Pieridae is the family that showed highest variation in age estimates among different  
489 studies. Our estimate (76.9 Ma, 95%CI=63.1–92.4 Ma) falls in between the youngest  
490 estimate from Wahlberg et al. (2013), in which the credibility interval goes down to  
491 39 Ma, and the oldest estimate from Braby et al. (2006), in which the oldest boundary  
492 of the credibility interval was 111.6 Ma. For Lycaenidae, which contain no fossils  
493 calibrations, the results between our core analysis (73.4, 95%CI=60.3–88.1),  
494 Wahlberg et al. (2013) and Heikkilä et al. (2012) were virtually identical. For the  
495 crown age of Riodinidae, our core analysis (70.9, 95%CI=57.2–85.2) gave identical  
496 results to Heikkilä et al. (2012). Espeland et al. (2015), in a study focusing  
497 specifically on this family found about 10 million-year older ages. Wahlberg et al.  
498 (2013), however, found a much younger estimate, about 20 Ma younger. For  
499 Nymphalidae, we have the greatest number of time calibrations, but they all tend to  
500 find very similar results. Our estimation (82.0, 95%CI=68.1–98.3) was very close to  
501 Wahlberg et al. (2013) and Heikkilä et al. (2012). This estimation was about 12  
502 million years younger than the study by Wahlberg et al. (2009) focusing on  
503 Nymphalidae.

## 504 **DISCUSSION**

505 We generated a genus-level phylogeny of the superfamily Papilionoidea, including  
506 994 taxa. Taking advantage of a recent revision of the lepidopteran fossil record we

507 established a new set of 12 fossil calibration points, which were combined to 10  
508 secondary calibrations from host plant ages.

509 *Fossils and Minimum Ages*

510 In the core analysis we adopted a very conservative approach. This choice involves  
511 taking into account the uncertainty surrounding the information available for each  
512 calibration point, although at the expense of the amount of useful information  
513 available. For fossil constraints, this had two consequences. First, we calibrated the  
514 stem of the focal clade a fossil was assigned to, by calibrating the divergence from its  
515 sister group instead of the first divergence recorded in the phylogeny within the focal  
516 clade itself. Calibrating the crown age of the focal clade – meaning that we assume  
517 that the fossil is “nested” within the clade – may lead to an overestimation of the  
518 crown age. Such would be the case if lineages are undersampled at the root, or if  
519 extinction occurred, or if the fossil belongs to a lineage that actually diverges  
520 somewhere along the stem. Calibrating a higher node with the age of the fossil, which  
521 involves loss of some information, is considered to be the best way to avoid these  
522 problems. Second, we used uniform prior distributions bounded by the age of the  
523 fossil and the age of angiosperms. We considered that fossils provide only a minimum  
524 age for a node, a condition that is especially exacerbated by the exceptionally poor  
525 fossil record of Lepidoptera in general (Labandeira and Sepkoski, 1993) and  
526 Papilionoidea in particular (Sohn et al. 2015) when compared to the four other major  
527 hyperdiverse insect lineages (Coleoptera, Hymenoptera, Diptera and Hemiptera).  
528 Prior expectation on the age of the node cannot be modeled more accurately without  
529 additional information. However, the marginal priors resulting from the interactions  
530 among the different priors actually strongly differ from this assumption.

531

532 *Higher- versus Lower-Level Calibrations*

533 Generally, favoring multiple calibrations placed at various positions in a tree instead  
534 of a single or few calibrations, seem to produce more reliable estimates of molecular  
535 clocks (Conroy & Van Tuinen 2003, Smith & Peterson 2002, Soltis et al. 2002,  
536 Duchêne et al. 2014). Calibrations distributed across a tree may allow a better  
537 estimation of substitution rates and their pattern of variation among lineages  
538 (Duchêne et al. 2014), and improve age estimates in cases of taxon undersampling  
539 (Linder et al. 2005).

540 Calibrations placed at deep levels in the tree are usually favored (Sauquet 2012, Hug  
541 & Roger 2007) over calibrations at lower levels for better capturing the overall  
542 genetic variation (Duchêne et al. 2014). Yet, deep calibrations also tend to  
543 underestimate the mean substitution rate and lead to an overestimation of shallow  
544 nodes, referred to as “tree extension” by Phillips (2009). For the butterflies, we  
545 investigated the consequences of using different subsets of fossil calibrations  
546 according to their positions in the tree (higher *versus* lower-level calibrations),  
547 compared to the full set of fossil constraints. With a subset of fossils placed only at  
548 higher levels in the phylogeny we obtained results similar to the full set of fossils in  
549 the core analysis, either at the deep nodes or shallow nodes, indicating no tree  
550 extension effect. This effect may also indicate that the lower level calibration points  
551 that are close to the tips are uninformative, and when included in the core analysis, do  
552 not affect the timescale but clearly affected the priors (see below).

553 Alternatively, lower-level calibrations can lead to an overestimation of the mean  
554 substitution rate across the tree, thereby underestimating the timescale (Phillips 2009).



555 Interestingly, when only a subset of fossils were used and placed close to the tips, it  
556 led to the youngest estimates, including the credibility intervals. This potentially  
557 indicates an effect of mean substitution rate overestimation. Also, we noticed in the  
558 core analysis that the nodes calibrated by *Protocoeliades* and *Vanessa* (two deep node  
559 constraints) showed posterior distributions abutting against the minimum boundaries  
560 defined by the age of the fossils, therefore preventing the tree (or at least these nodes)  
561 to be younger.

562

### 563 *Host Plants and Maximum Ages*

564 For calibration points constrained by the age of the host plant group, we considered  
565 that only the crown of the focal clade could be assigned confidently to the host plant  
566 group, as the stem or part of the stem could be older than the host plant (the host plant  
567 shift would be happening somewhere along the stem). Support arises from molecular  
568 biological and paleobiological evidence that the establishment of specialized insect-  
569 herbivore associations can considerably postdate the origins of their hosts, as in a  
570 Bayesian analysis of 100 species of leaf-mining *Phyllonorycter* moths (Lepidoptera:  
571 Gracillariidae) and their dicot angiosperm hosts (Lopez-Vaamonde et al. 2006).  
572 Relying on host plant ages for calibrating a butterfly tree is questionable while the  
573 timing of the divergence of angiosperms is still highly controversial (e.g. Magallón et  
574 al. 2015, Foster et al. 2017). As a result, first we calibrated our tree using the oldest  
575 boundary of 95% CI of the stem age of a host plant clade. This allowed us to take into  
576 account the uncertainty surrounding the timing of the first appearance of the host  
577 plant but consequently, it also relaxed the prior hypothesis for the calibrations.  
578 Secondly, we compared two alternative timescales for the angiosperms: a

579 paleontological estimate, which infers an Early Cretaceous origin of angiosperms  
580 (Magallón et al. 2015), and a molecular clock estimate that we extracted from Foster  
581 et al. (2017), which infers a stem age for angiosperms during the Early Triassic about  
582 100 million years older. These two alternative scenarios affected the size of the  
583 credibility intervals and the shape of the posterior distributions. For the crown of  
584 Papilionoidea, the upper boundary of the 95%CI was ~37 million years older when  
585 using the molecular clock estimate. However, the shape of the distribution was very  
586 asymmetrical, with a mode of the distribution very close to the core analysis (101.0  
587 Ma), suggesting that the estimation for the age of the root still concentrated around  
588 the same ages. Using the hypothesis of an Early Triassic origin of angiosperms  
589 implied very permissive priors toward old ages, which are most likely responsible for  
590 the very wide credibility intervals and asymmetrical posterior distributions recovered  
591 in the alternative analysis of using ages from Foster et al. (2017). Therefore, it is  
592 tempting to use the time-scale inferred using Magallón et al. (2015)'s ages of  
593 angiosperms, as it greatly narrows down the uncertainty surrounding butterfly ages,  
594 and aligns more realistically with the fossil angiosperm record. However, as long as  
595 there is no consensus on the timing of angiosperm diversification there is no reason to  
596 favor one or the other.

597

### 598 *Priors and Posterior Distributions*

599 We compared the marginal priors to the posterior distributions for different analyses  
600 for the root of Papilionoidea and for the different calibration points in the core  
601 analysis. We found several calibration points showing a substantial shift of posterior  
602 distribution. This indicates that our age estimates are not entirely driven by the set of

603 constraints, but instead that the molecular dataset brings additional information about  
604 the age of the calibrated nodes. An interesting pattern we found in the core analysis is  
605 the consistent trend of posterior distributions of the lower-level calibrated nodes to  
606 shift toward older ages than the priors. Meanwhile, some higher-level node  
607 calibrations shifted toward younger ages than the prior but most of them largely  
608 overlapped with their prior distribution. Consequently, posterior estimates tend to  
609 contract the middle part of tree compared to the prior estimates.

610 There are at least three reasons for the anomalous gap between the earliest fossil  
611 papilionoid occurring at 55.6 Ma and its corresponding Bayesian median age of 110  
612 Ma, that represents a doubling of the lineage duration. First, it long has been known  
613 that the lepidopteran fossil record is extremely poor when compared to the far more  
614 densely and abundantly occurring fossils of the four other hyperdiverse, major insect  
615 lineages of Hemiptera, Coleoptera, Diptera and Hymenoptera (Labandeira and  
616 Sepkoski, 1993). Second, particularly large-bodied apoditrysians such as  
617 Papilionoidea, have even a poorer fossil record than other Lepidoptera in general,  
618 particularly as they bear a fragile body habitus not amenable to preservation.  
619 Additionally, as external feeders papilionoids lack a distinctive, identifiable trace  
620 fossil record such as leaf mines, galls and cases (Sohn et al. 2015). Third, there are  
621 very few productive terrestrial compression or amber deposits spanning the Upper  
622 Cretaceous, from 100 Ma to the Cretaceous–Paleogene boundary of 66.0 Ma, and the  
623 part of the Paleogene Period from 66.0 Ma to the earliest papilionoid fossil of 55.6  
624 Ma (Labandeira, 2014; Sohn et al., 2015). Some of these deposits have recorded very  
625 rare small moth fossils, but to date no papilionoid, or for that matter, other large  
626 lepidopteran taxa such as saturniids or pyraloids have been found.

627 The root of the tree was only calibrated with the oldest fossil in our dataset, a 55.6  
628 million-year-old papilionoid, and the crown age of the angiosperms. However, the  
629 prior distribution for the root in the core analysis clearly excluded an origin of  
630 butterflies close to 55.6 Ma, but rather a distribution centered on a median of 110 and  
631 ranging between 86.4 and 136.2 Ma. The posterior distribution for the root in the core  
632 analysis largely overlapped with the prior. However, when we used alternative ages  
633 for the angiosperms (older ages), the marginal prior for the root shifted to  
634 substantially older ages. Nevertheless, the posterior distribution showed a significant  
635 shift toward younger ages, albeit highly skewed, toward ages similar to the core  
636 analysis. This suggests that our estimate of the root age in the core analysis is not  
637 simply driven by our set of priors, even if we do not actually observe a shift between  
638 marginal prior and posterior distributions.

639 We observed some differences in prior and posterior distributions at the root when  
640 considering only subsets of fossils. When using only the subset of higher-level fossils,  
641 the marginal prior for the root showed very little difference from the core analysis  
642 prior and the posterior distributions completely overlapped. When using the subset of  
643 lower-level fossils the marginal prior remained similar to the core analysis but the  
644 posterior distribution showed a substantial shift toward younger ages, yielding the  
645 youngest estimation of the age of Papilionoidea among all our analyses. As such, it  
646 seems that the choice of fossils did not change the prior estimation of the root, but the  
647 posterior distribution was largely influenced by higher-level fossils. As we suggested  
648 earlier, lower-level fossils only may be overestimating the mean substitution rate  
649 across the tree, and therefore underestimating the time scale, while the  
650 implementation of higher-level fossils seems to be correcting for this.

651 *Timescale of Butterflies Revisited*

652 We propose a new estimate for the timing of diversification of butterflies, based on an  
653 unprecedented set of fossil and host-plant calibrations. We estimated the origin of  
654 butterflies between 89.5 and 129.5 Ma, the median of this posterior distribution being  
655 107.6 Ma, which corresponds to the Early Cretaceous–Late Cretaceous boundary  
656 interval. The result of our core analysis for the root is very close to previous estimates  
657 by Wahlberg et al. (2013) and Heikkilä et al. (2012). The comparisons of alternative  
658 analyses, the prior and posterior distributions showed that this result is robust to  
659 almost all the choices made throughout the core analysis and that our molecular  
660 dataset contains significant information in addition to the time constraints. This  
661 estimation means that there is a 45 million-year-long gap between the oldest known  
662 butterfly fossil and the molecular clock estimate. Accordingly, as Brown & Smith  
663 (2017) stated for the case of angiosperms, we do not know whether a larger molecular  
664 dataset – implying potentially more information for estimating the molecular clock–  
665 would allow the root to become younger. Alternatively, the fossil record for  
666 butterflies is so sparse that an intervening fossil gap is very likely. Besides, the fossil  
667 *Protocoeliades kristenseni*, which is 55.6 Ma can be assigned confidently to the  
668 crown of the family Hesperidae and the stem of Coeliadinae well within the  
669 Papilionoidea. For angiosperms, a very rich fossil record is available compared to  
670 butterflies (e.g., Magallón et al. (2015), which used 137 fossils to calibrate a  
671 phylogeny of angiosperms), rendering the absence of angiosperms, either as pollen or  
672 macrofossils, that are older than 136 Ma much more puzzling.

673

674 **ACKNOWLEDGMENTS**

675 This is contribution 366 of the Evolution of Terrestrial Ecosystems consortium at the  
676 National Museum of Natural History, in Washington D.C. NW acknowledges funding  
677 form the Swedish Research Council (Grant No. 2015-04441) and from the  
678 Department of Biology, Lund University. AVLF thanks CNPq (grant 303834/2015-3),  
679 National Science Foundation (DEB-1256742) and FAPESP (grant 2011/50225-3).  
680 This publication is part of the RedeLep (Rede Nacional de Pesquisa e Conservação de  
681 Lepidópteros) SISBIOTABrasil/CNPq (563332/2010-7). MH gratefully  
682 acknowledges funding from a Peter Buck Postdoctoral Stipend, Smithsonian  
683 Institution National Museum of Natural History.

684

#### 685 **SUPPORTING INFORMATION**

686 S1. List of taxa and Genbank accession codes.

687 S2. Tree obtained from the core analysis. Node ages are the median of node age  
688 posterior distributions.

689 S3. Tree obtained from the reduced dataset. Node ages are the median of node age  
690 posterior distributions.

691 S4. Tree obtained when using only higher-level fossil calibrations. Node ages are the  
692 median of node age posterior distributions.

693 S5. Tree obtained when using only lower-level fossil calibrations. Node ages are the  
694 median of node age posterior distributions.

695 S6. Tree obtained when using exponential fossil calibration priors. Node ages are the  
696 median of node age posterior distributions.

697 S7. Tree obtained when adding a mitochondrial gene fragment. Node ages are the  
698 median of node age posterior distributions.

699 S8. Tree obtained when using the host-plant ages obtained from Foster et al. (2017).  
700 In S8a node ages are the median of node age posterior distributions, while in S8b the  
701 node ages are the mode the mode of the kernel density estimate of the posterior  
702 distribution.

703

704 **LITERATURE CITED**

705 Braby, M.F., Vila, R., Pierce, N.E. 2006. Molecular phylogeny and systematics of the  
706 Pieridae (Lepidoptera: Papilionoidea): higher classification and biogeography. Zool. J.  
707 Linn. Soc. 147:239–275.

708 Brenner, G.J. 1996. Evidence for the earliest stage of angiosperm pollen evolution: a  
709 paleoequatorial section from Israel. In: Taylor, D.W., Hickey, L.J., editors, Flowering  
710 plant origin, evolution & phylogeny. Boston, MA: Springer. P. 91–115.

711 Brown, F.M. 1976. †*Oligodonta florissantensis*, gen. n., sp. nov. (Lepidoptera:  
712 Pieridae). Bull. Allyn Mus., 37:1–4.

713 Brown, J.W., and Smith, S.A. 2017. The past sure is tense: On interpreting  
714 phylogenetic divergence time estimates. Syst. Biol., 66, doi: 10.1093/sysbio/syx074

715 Chazot, N., Wilmott, K.R., Freitas, A.V.L., de Silva, D.L., Pellens, R., Elias, M. 2016.  
716 Patterns of species, phylogenetic and mimicry diversity of clearwing butterflies in the  
717 Neotropics. In: Pellens, R., Grandcolas, P., editors, Biodiversity conservation and  
718 phylogenetic systematics. Topics in Biodiversity and Conservation, 14:333–353

- 719 Cockerell, T.D.A. 1907. A fossil butterfly of the genus *Chlorippe*. *Canad. Entomol.*,  
720 39:361–363,
- 721 Condamine, F.L., Toussaint, E.F.A., Clamens, A.L., Genson, G., Sperling, F.A.,  
722 Kergoat, G.J. 2015. Deciphering the evolution of birdwing butterflies 150 years after  
723 Alfred Russel Wallace. *Sci. Rept.*, 5:11860.
- 724 Conroy, C.J., and van Tuinen, M. 2003. Extracting time from phylogenies: positive  
725 interplay between fossil and genetic data. *J. Mammal.* 84:444–455.
- 726 de Jong, R. 2016. Reconstructing a 55-million-year-old butterfly (Lepidoptera:  
727 Hesperiiidae). *Eur. J. Entomol.* 113:423–428.
- 728 de Jong, R. 2017. Fossil butterflies, calibration points and the molecular clock  
729 (Lepidoptera: Papilionoidea). *Zootaxa* 4270:1–63.
- 730 dos Reis, M. and Yang, Z., 2013. The unbearable uncertainty of Bayesian divergence  
731 time estimation. *J. Syst. Evol.* 51:30–43.
- 732 Drummond, A.J., Suchard, M.A., Xie, D., Rambaut, A. 2012. Bayesian phylogenetics  
733 with BEAUTi and BEAST 1.7. *Mol. Biol. Evol.* 29:1969–1973.
- 734 Duchêne, S., Lanfear, Ho, S.Y.W., 2014. The impact of calibration and clock-model  
735 choice on molecular estimates of divergence times. *Mol. Phylogen. Evol.*, 78:277–289.
- 736 Durden, C.J., and Rose, H. 1978. Butterflies from the Middle Eocene: the earliest  
737 occurrence of fossil Papilionoidea (Lepidoptera). *Pearce-Sellards Ser.* 29:1–25,



- 738 Foster, C.S.P., Sauquet H., van der Merwe, M., McPherson, H., Rosette, M., Ho,  
739 S.Y.W. 2017. Evaluating the impact of genomic data and priors on Bayesian  
740 estimates of the angiosperm evolutionary timescale. *Syst. Biol.*, 66:338–351.
- 741 Garzón-Orduña, I.J., Silva-Brandão, K.L., Wilmott, K.R., Freitas, A.V.L., Brower,  
742 A.V.Z. 2015. Incompatible ages for clearwing butterflies based on alternative  
743 secondary calibrations. *Syst. Biol.*, 64:752–767.
- 744 Hall, J.P.W., Robins, R.K., Harvey, D.J. 2004. Extinction and biogeography in the  
745 Caribbean: new evidence from a fossil riodinid butterfly in Dominican amber. *Proc. R.*  
746 *Soc. Lond. B*, 271:797–801.
- 747 Heer, O. 1849. Die Insektenfauna der Tertiärgelände von Oeningen und von Radoboj  
748 in Croatien. Vol. 2. Wilhelm Engelmann, Leipzig, 264 pp.
- 749 Heikkilä, M., Kaila, L., Mutanen, M., Peña, C., Wahlberg, N. 2012. Cretaceous origin  
750 and repeated Tertiary diversification of the redefined butterflies. *Proc. R. Soc. Lond.*  
751 *B*, 279:1093–1099.
- 752 Ho, S.Y., and Phillips, M.J. 2009. Accounting for calibration uncertainty in  
753 phylogenetic estimation of evolutionary divergence times. *Syst. Biol.* 58: 367–380.
- 754 Hug, L.A., and Roger, A.J. 2007. The impact of fossils and taxon sampling on ancient  
755 molecular dating analyses. *Mol. Biol. Evol.* 24:1889–1897.
- 756 International Commission on Stratigraphy. 2012. International Chronostratigraphic  
757 Chart: <http://www.stratigraphy.org/ICSchart/ChronostratChart2012.pdf>

- 758 Kozak, K.M., Wahlberg, N., Neild, A.F.E., Dasmahapatra, K.J.K., Jiggins, C.D. 2015.  
759 Multilocus species trees show the recent adaptive radiation of the mimetic *Heliconius*  
760 butterflies. *Syst. Biol.*, 64:505–524,
- 761 Labandeira, C.C. 2014. Amber. In: Laflamme, M., Schiffbauer, J.D., Darroch, S.A.F.,  
762 editors, Reading and writing of the fossil record: Preservational pathways to  
763 exceptional fossilization. *Paleontol. Soc. Pap.*, 20:163–216.
- 764 Labandeira, C.C. and Sepkoski, J.J., Jr. 1993. Insect diversity in the fossil record.  
765 *Science*, 261:310–315.
- 766 Lanfear, R., Calcott, B., Ho, S.Y.W., Guindon, S. 2012. PartitionFinder: combined  
767 selection of partitioning schemes and substitution models for phylogenetic analysis.  
768 *Mol. Biol. Evol.* 29:1695–1701.
- 769 Linder, H.P., Hardy, C.R., Rutschmann, F. 2005. Taxon sampling effects in molecular  
770 clock dating: An example from the African Restionaceae. *Mol. Phylogen. Evol.*  
771 35:569–582.
- 772 Lopez-Vaamonde, C., Wikström, N., Labandeira, C., Godfray, H.C.J., Goodman, S.J.,  
773 Cook, J.M. 2006. Fossil-calibrated molecular phylogenies reveal that leaf-mining  
774 moths radiated millions of years after their host plants. *J. Evol. Biol.*, 19:1314–1326,
- 775 Magallón, S. Gómez-Acevedo, S., Sánchez-Reyes, L.L., Hernández-Hernández, T.  
776 2015. A metacalibrated time-tree documents the early rise of flowering plant  
777 phylogenetic diversity. *New Phytol.*, 207:437–453.

- 778 Martins-Neto, R.G., Kucera-Santos, J.C., Vieira, F.R. de M., Fragoso, L.M. de C.  
779 1993. Nova espécie de borboleta (Lepidoptera: Nymphalidae: Satyrinae) da Formação  
780 Tremembé, Oligoceno do Estado de São Paulo. *Acta Geol. Leopold.*, 37:5–16.
- 781 Matos-Maravi, P.F., Peña, c., Wilmott, K.R., Freitas, A.V.L., Whalberg, N. 2013.  
782 Systematics and evolutionary history of butterflies in the “*Taygetis* clade”  
783 (Nymphalidae: Satyrinae: Euptychiina): towards a better understanding of  
784 Neotropical biogeography. *Mol. Phylogenet. Evol.* 66:54–68.
- 785 Miller, J.Y. and Brown, F.M. 1989. A new Oligocene fossil butterfly, *Vanessa*  
786 †*amerindica* (Lepidoptera: Nymphalidae), from the Florissant Formation, Colorado.  
787 *Bull. Allyn Mus.*, 126:1–9.
- 788 Nel, A. and Descimon, H. 1984. Une nouvelle espèce de Lépidoptère fossile du  
789 Stampien de Cereste (Lepidoptera Satyridae). *Géol. Méditerran.* 11:287–293.
- 790 Nel, A., Nel, J, Balme, C. 1993. Un nouveau Lépidoptère Satiyrinae fossile de  
791 l’Oligocene du Sud-Est de la France (Insecta, Lepidoptera, Nymphalidae). *Linn. Belg.*,  
792 14:20–36.
- 793 Paradis, E., Claude, J., & Strimmer, K. 2004. APE: analyses of phylogenetics and  
794 evolution in R language. *Bioinformatics*, 20(2), 289-290.
- 795 Parham, J.F., Donoghue, P., Bell, C.J., Calway, T.D., Head, J.J., Holroyd, P.A., Inoue,  
796 J.G., Irmis, R.B., Joyce, W.G., Ksepka, D.T., Patané, J.S.L., Smith, N.D., Tarver, J.E.,  
797 van Tuinen, M., Yang, Z., Angielczyk, K.D., Greenwood, J.M., Hipsley, C.A., Jacobs,  
798 L., Mackovicky, P.J., Miller, J., Smith, K.T., Theodor, J.M., Warnock, R.C.M.,  
799 Benton, M.J. 2012. Best practices for justifying fossil calibrations. *Syst. Biol.*,  
800 61:346–359.

- 801 Peña, C., and Malm, T. 2012. VoSeq: A voucher and DNA sequence web application.  
802 PLoS ONE, 7(6):e39071.
- 803 Peñalver, E., and Grimaldi, D.A. 2006. New data on Miocene butterflies in  
804 Dominican Amber (Lepidoptera: Riodinidae and Nymphalidae) with the description  
805 of a new nymphalid. *Am. Mus. Novit.* 3591:1–17.
- 806 Phillips, M.J. 2009. Branch-length estimation bias misleads molecular dating for a  
807 vertebrate mitochondrial phylogeny. *Gene*, 441:132–140.
- 808 R Development Core Team (2008). R: A language and environment for statistical  
809 computing. R Foundation for Statistical Computing, Vienna, Austria. ISBN 3-  
810 900051-07-0, URL <http://www.R-project.org>.
- 811 Rambaut, A., Suchard, M. A., Xie, D., & Drummond, A. J. 2014. Tracer v1.6,  
812 Available from <http://tree.bio.ed.ac.uk/software/tracer/>.
- 813 Rannala, B. and Yang, Z. 2007. Inferring speciation times under an episodic  
814 molecular clock. *Syst. Biol.*, 56:453–466.
- 815 Rebel, H. 1898. Fossile Lepidopteren aus der Miocän-Formation von Gabbro.  
816 *Sitzungsber. Akad. Wiss. Wien*, 107:731–745.
- 817 Sahoo, R. K., Warren, A. D., Collins, S. C., & Kodandaramaiah, U. 2017. Hostplant  
818 change and paleoclimatic events explain diversification shifts in skipper butterflies  
819 (Family: Hesperiiidae). *BMC Evolutionary Biology*, 17: 174. Doi: 10.1186/s12862-  
820 017-1016-x
- 821 Sahoo, R.K., Warren, A.D., Wahlberg, N., Brower, A.V.Z., Lukhtanov, V.A.,  
822 Kodandaramaiah, U. 2016. Ten genes and two topologies: an exploration of higher

- 823 relationships in skipper butterflies (Hesperiidae). *Peer J*, 4:e2653, doi:  
824 10.7717/peerj.2653
- 825 Sauquet, H., Ho, S.Y.W., Gandolfo, M.A., Jordan, G.I., Wilf, P., Cantrill, D.J., Bayly,  
826 M.J., Bromham, L., Brown, G.K., Carpenter, R.J., Lee, D.M., Murphy, D.J.,  
827 Sniderman, J.M.K., Udovice, F. 2012. Testing the impact of calibration on molecular  
828 divergence times using a fossil-rich group: The case of *Nothofagus* (Fagales). *Syst.*  
829 *Biol.*, 61:289–313.
- 830 Scudder, S.H. 1875. Fossil butterflies. *Mem. Am. Assoc. Adv. Sci.* 1:1–99.
- 831 Scudder, S.H. 1889. The fossil butterflies of Florissant. United States Geological  
832 Survey, 8<sup>th</sup> Annual Report, pp. 439–472.
- 833 Scudder, S.H. 1892. Some insects of special interest from Florissant, Colorado, and  
834 other points in the Tertiaries of Colorado and Utah. *Bull. U.S. Geol. Surv.*, 93:1–35.
- 835 Smith, A.B., and Peterson, K.J. 2002. Dating the time of origin of major clades:  
836 Molecular clocks and the fossil record. *Annu. Rev. Earth Planet. Sci.* 30:65–88.
- 837 Sohn, J.C., Labandeira, C., Davis, D., Mitter, C. 2012. An annotated catalog of fossil  
838 and subfossil Lepidoptera (Insecta: Holometabola) of the world. *Zootaxa* 3286:1–132.
- 839 Sohn, J.C., Labandeira, C.C., Davis, D.R. 2015. The fossil record and taphonomy of  
840 butterflies and moths (Insecta, Lepidoptera) and implications for evolutionary  
841 diversity and divergence-time estimates. *BMC Evol. Biol.* 15:12.
- 842 Soltis, D.E., Soltis, P.S., Zanis, M.J. 2002. Phylogeny of seed plants based on  
843 evidence from eight genes. *Am. J. Bot.* 89:1670–1681.

- 844 Stamatakis, A. 2006. RAxML-VI-HPC: maximum likelihood-based phylogenetic  
845 analyses with thousands of taxa and mixed models. *Bioinformatics* 22:2688–2690.
- 846 Toussaint, E.F.A. and Balke, M. 2016. Historical biogeography of *Polyura* butterflies  
847 in the oriental Palaeotropics: trans-archipelagic routes and South Pacific island  
848 hopping. *J. Biogeogr.* 43:1560–1572.
- 849 Wahlberg, N., Leneveu, J., Kodandaramaiah, U., Peña, C., Nylin, S., Freitas, A.V.L.,  
850 Brower, A.V.Z. 2009. Nymphalid butterflies diversify following near demise at the  
851 Cretaceous/Tertiary boundary. *Proc. R. Soc. Lond. B*, 276:4295–4302.
- 852 Wahlberg, N., Wheat, C.W., Peña, C. 2013. Timing and patterns in the taxonomic  
853 diversification of Lepidoptera (butterflies and moths). *PLoS ONE*, 8(11):e80875.
- 854 Walker, J.D., Geissman, J.W., Bowring, S.A., Babcock, L.E. 2013. The Geological  
855 Society of America geologic time scale. *GSA Bull.*, 125:259–272.
- 856 Warnock, R.C.M., Yang, Z., Donoghue, P.C.J. 2012. Exploring uncertainty in the  
857 calibration of the molecular clock. *Biol. Lett.*, 9:156–159.
- 858 Warnock, R.C.M., Parham, J.F., Joyce, W.G., Lyson, T.R., Donoghue, P.C.J. 2015.  
859 Calibration uncertainty in molecular dating analyses: there is no substitute for the  
860 prior evaluation of time priors. *Proc. R. Soc. Lond. B*, 282:20141013.
- 861 Yang, Z, and Rannala, B. 2006. Bayesian estimation of species divergence times  
862 under a molecular clock using multiple fossil calibrations with soft bounds. *Mol. Biol.*  
863 *Evol.*, 23:212–226.
- 864

865 TABLE 1. (a) Fossil calibration points used to calibrate the tree as a minimum age for  
866 the *Clade calibrated*. Unless stated otherwise, the fossil calibrations were placed at  
867 the stem of the clade calibrated. *Lower* and *upper* values indicate the prior truncation  
868 for both the uniform and exponential priors. The 140 Ma year upper truncation  
869 corresponds to the age of Angiosperms from Magallón et al. 2015. A different upper  
870 truncation value results from a fossil prior interacting with a host plant prior placed at  
871 the same node or a lower node. *Mean* and *offset* are parameter values for the  
872 exponential prior distribution. (b) Host-plant clades used to calibrate the tree as a  
873 maximum age for the *Calibrated node*. Host plant calibrations were placed at the  
874 crown of the clade calibrated. Ages from both Magallón et al. (2015) and Foster et al.  
875 (2017) are indicated.

876 a)

| <b>Fossils</b>                                          | <b>Clade calibrated</b>                                             | <b>lower</b> | <b>upper</b> | <b>mean</b> | <b>offset</b> |
|---------------------------------------------------------|---------------------------------------------------------------------|--------------|--------------|-------------|---------------|
| <i>Doritites bosniaskii</i><br>Rebel, 1898              | Papilionidae: Parnassiinae:<br>Luehdorfiini                         | 5.3          | 140          | 25          | 5.3           |
| <i>Dynamine alexae</i><br>Peñalver & Grimaldi, 2006     | Nymphalidae: Biblidinae:<br><i>Dynamine</i>                         | 15.9         | 89           | 20          | 15.9          |
| <i>Lethe corbieri</i><br>Nel, Nel & Balme, 1993         | Nymphalidae: Satyrinae:<br>Satyrini                                 | 28.3         | 65           | 25          | 28.3          |
| <i>Mylothrites pluto</i><br>Heer, 1849                  | Pieridae:<br>Coliadinae+Pierinae                                    | 15.9         | 100          | 50          | 15.9          |
| <i>Neorinella garciae</i><br>Martins-Neto et al., 1993  | Crown of Amathusiini                                                | 23.0         | 65           | 20          | 23.0          |
| <i>Pamphilites abdita</i><br>Scudder, 1875              | Hesperiidae: Hesperinae                                             | 23.0         | 140          | 30          | 23.0          |
| <i>Prolibythea vagabunda</i><br>Scudder, 1889           | Nymphalidae: Libytheinae                                            | 33.8         | 140          | 40.0        | 33.8          |
| <i>Protocoeliades kristenseni</i><br>de Jong, 2016      | Hesperiidae: Coeliadinae                                            | 55.6         | 140          | 35          | 55.6          |
| <i>Thaites ruminiana</i><br>Scudder, 1875               | Papilionidae: Parnassiinae:<br>Parnassiini                          | 23.0         | 140          | 25          | 23.0          |
| <i>Theope</i> sp                                        | Riodinidae: Riodininae:<br>Nymphidiini: <i>Theope</i>               | 15.9         | 140          | 25          | 15.9          |
| <i>Voltinia dramba</i><br>Hall, Robinson & Harvey, 2004 | Riodinidae: Riodininae:<br>Mesosemiini: <i>Voltinea</i>             | 15.9         | 140          | 30          | 15.9          |
| <i>Vanessa amerindica</i><br>Miller & Brown, 1989       | Nymphalidae:<br>Nymphalinae: Nymphalini                             | 33.8         | 140          | 30          | 33.8          |
| <i>Doxocopa wilmattae</i><br>Cockerell, 1907            | Nymphalidae:<br>Nymphalinae+Biblidinae+<br>Limenitidinae+Apaturinae |              |              | Not used    |               |
| <i>Praepapilio colorado</i><br>Durden & Rose, 1978      | Papilionidae                                                        |              |              | Not used    |               |

877

878

879 b)

| <b>Host plant clade</b> | <b>Clade calibrated</b>                                                      | <b>Magallón et al. 2015</b> | <b>Foster et al. 2017</b> |
|-------------------------|------------------------------------------------------------------------------|-----------------------------|---------------------------|
| Angiospermae            | root                                                                         | 140                         | 252                       |
| Poaceae                 | Hesperiidae: Hesperinae                                                      | 65                          | 112                       |
| Poaceae                 | Nymphalidae: Satyrinae                                                       | 65                          | 112                       |
| Fabaceae                | Pieridae                                                                     | 100                         | 123                       |
| Brassicaceae            | Pieridae: Pierinae                                                           | 103                         | 97                        |
| Rubiaceae               | Riodinidae: Leucochimona+Mesophtalma+<br>Mesosemia+Perophtalma<br>+Semomesia | 87                          | 85                        |
| Apocynaceae             | Nymphalidae: Danainae                                                        | 69                          | 85                        |
| Solanaceae              | Nymphalidae: Ithomiini                                                       | 87                          | 68                        |
| Euphorbiaceae           | Nymphalidae: Biblidinae                                                      | 89                          | 104                       |
| Sapindaceae             | Nymphalidae: Biblidinae: Epiphilini+<br>Callicorini                          | 87                          | 91                        |

880

881

882



883 FIGURE 1. Time-calibrated tree obtained from the core analysis. a) The relationships  
884 and age estimates among the subfamilies of Papilionoidea. b) The relationships and  
885 age estimates among the genera across the different families. Age estimates are  
886 indicated at the nodes (Ma). Node bars represent the 95% credibility intervals.

887

888 FIGURE 2. Comparison of node age estimates for the root of Papilionoidea and the  
889 seven families between the core analysis and the seven alternative analyses. Mode,  
890 median and 95% credibility interval are presented.

891

892 FIGURE 3. Marginal prior (grey) and posterior distributions (orange) for the nodes  
893 calibrated in the core analysis. Blue dashed lines represent minimum boundaries;  
894 green dashed lines represent maximum boundaries.

895

896 FIGURE 4. Marginal prior and posterior distributions for the root age in the core  
897 analysis using either a) alternative host-plant ages or b) alternative subsets of fossil  
898 calibrations.

899

900 FIGURE 5. Comparison of node age estimates for the root of Papilionoidea and the  
901 seven families between this study (core analysis) and estimates from previous studies.  
902 Mode and 95%CI for the core analysis are presented. For the other studies the values  
903 reported in the original study are used.

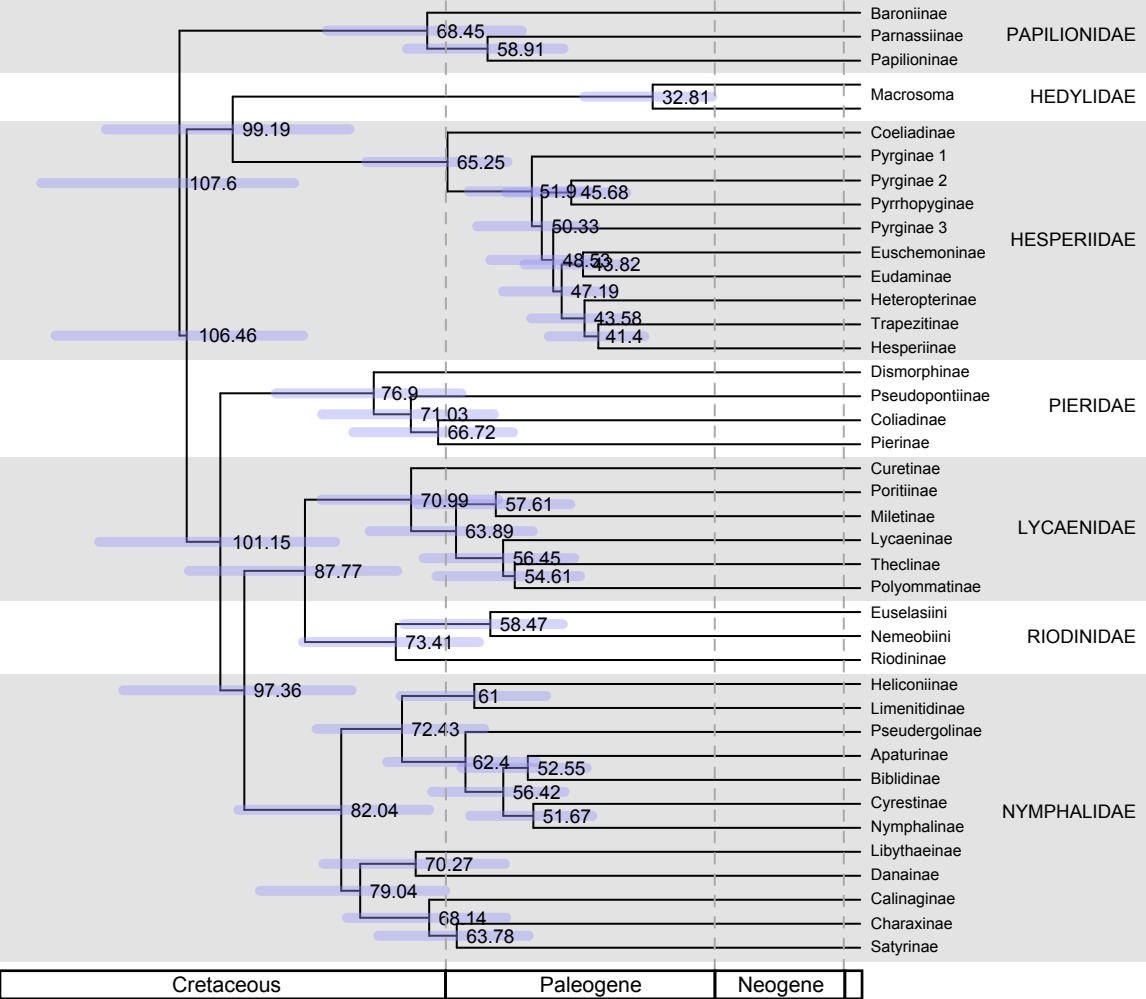

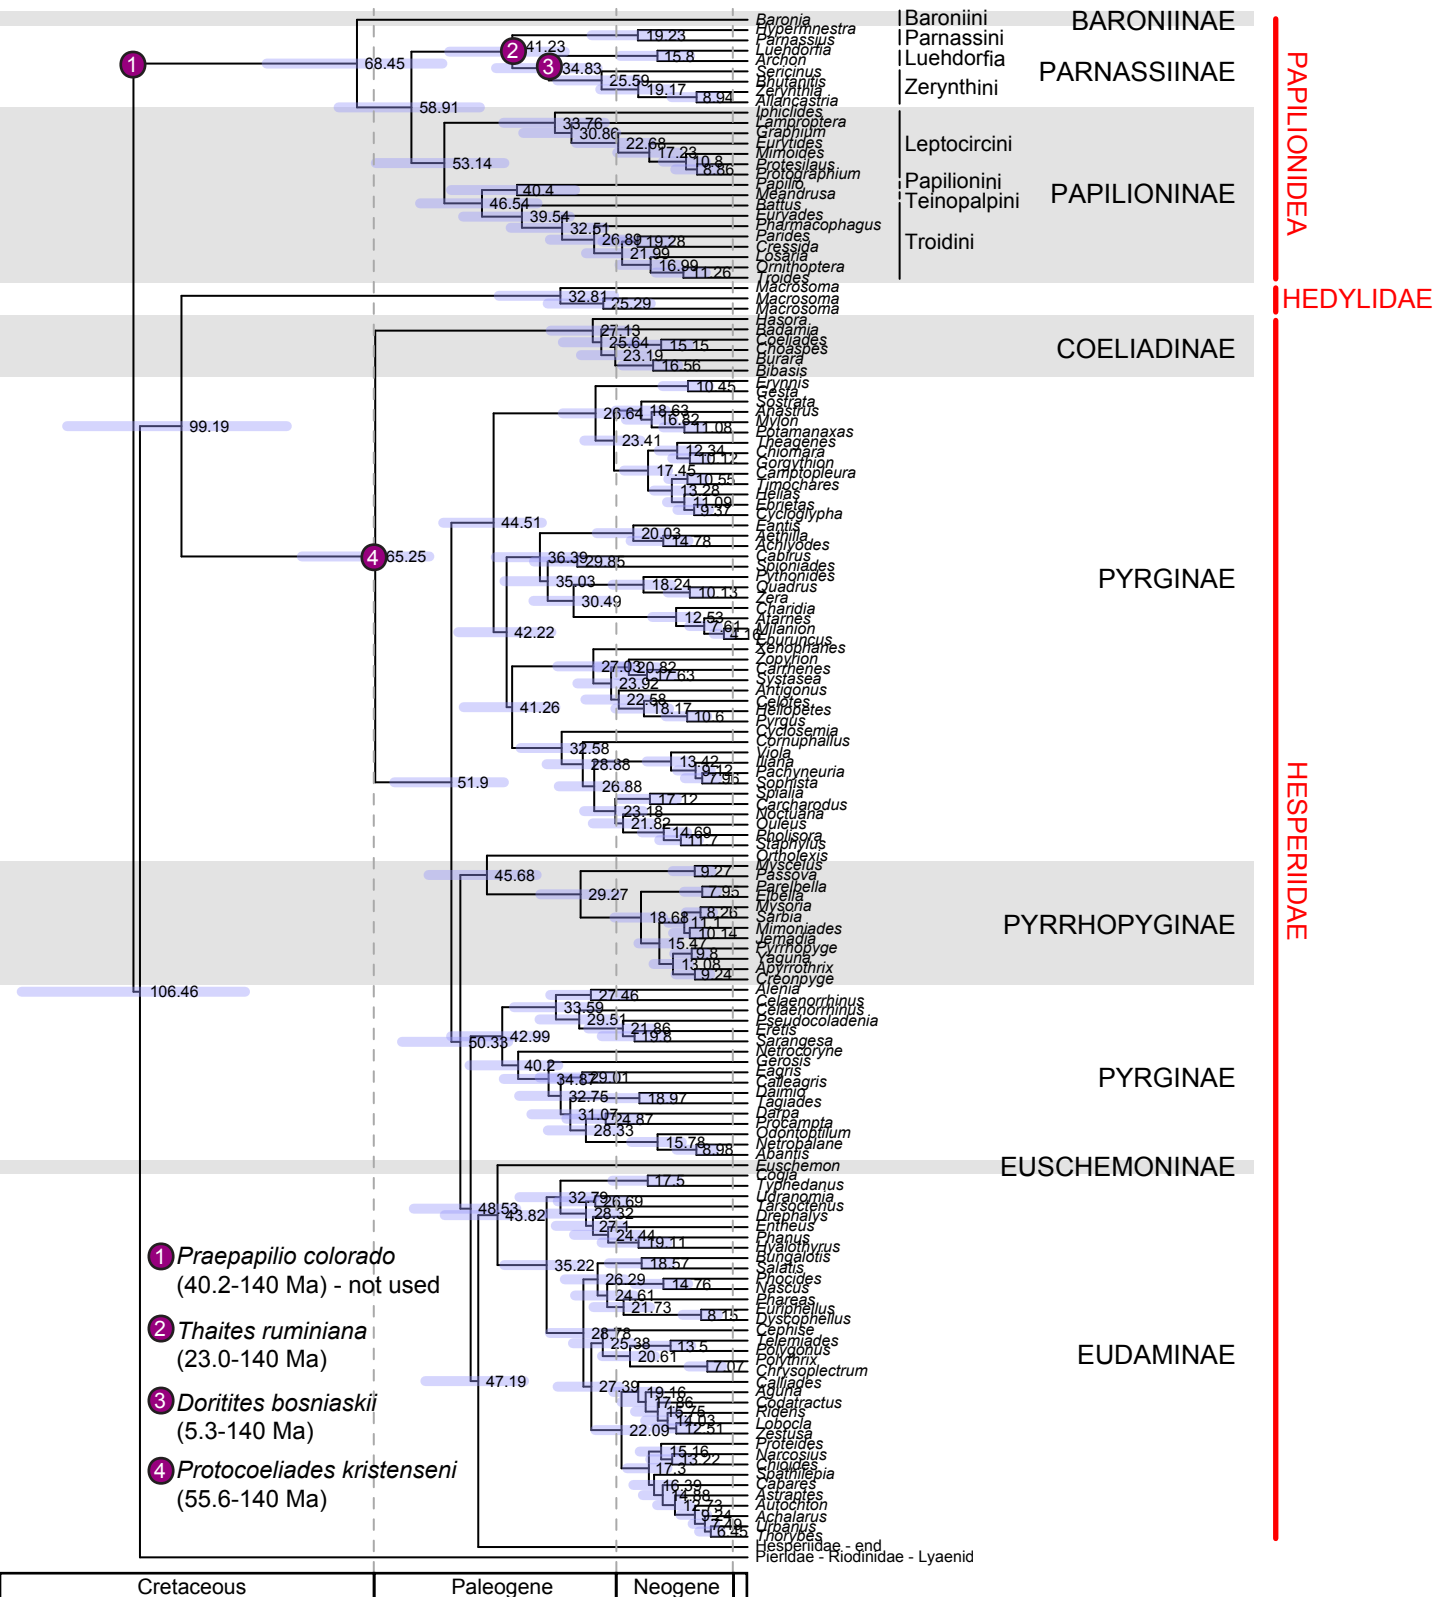

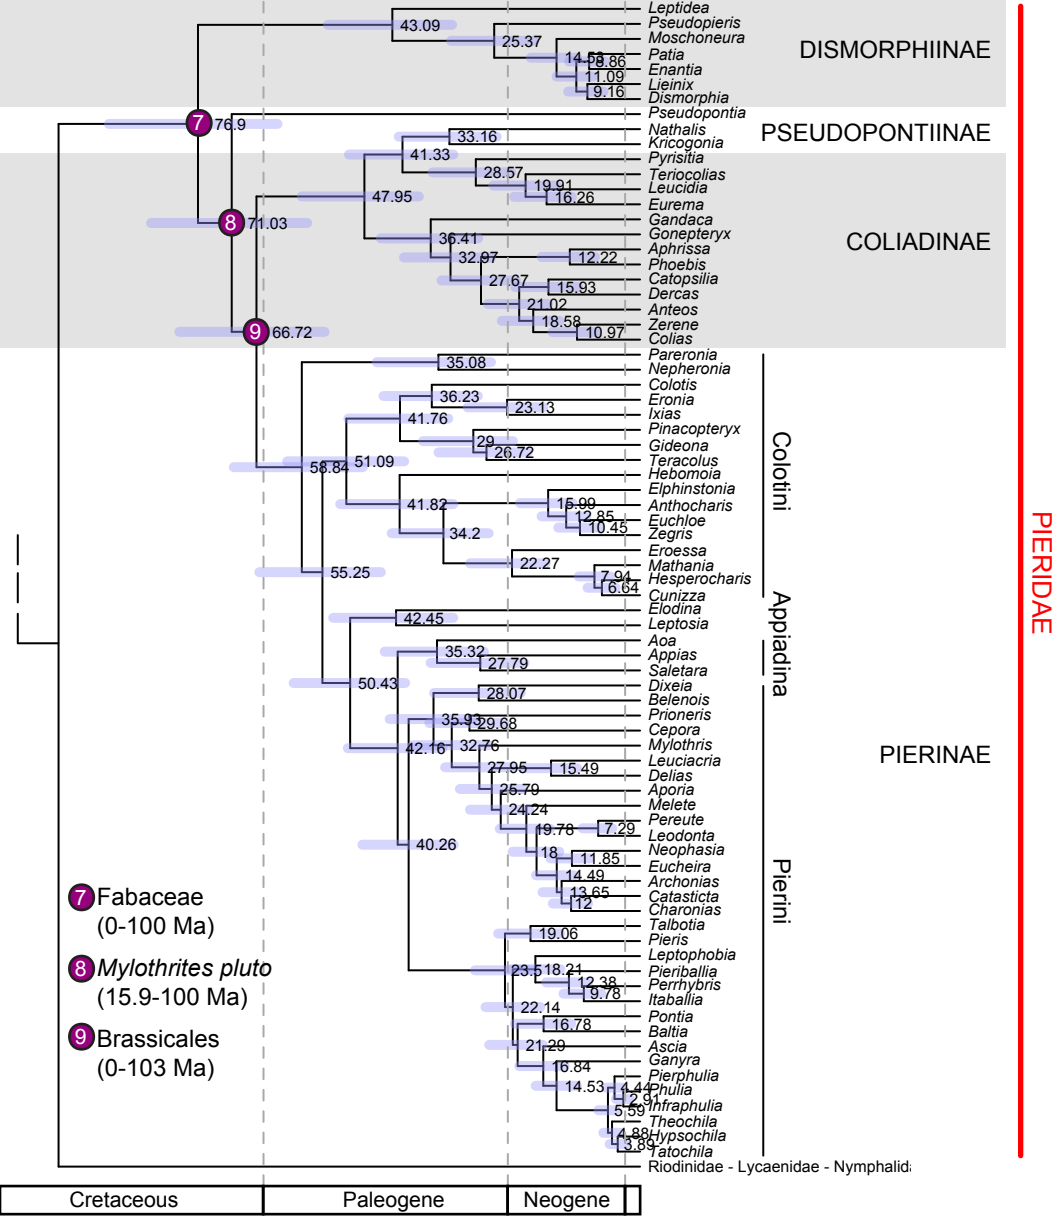

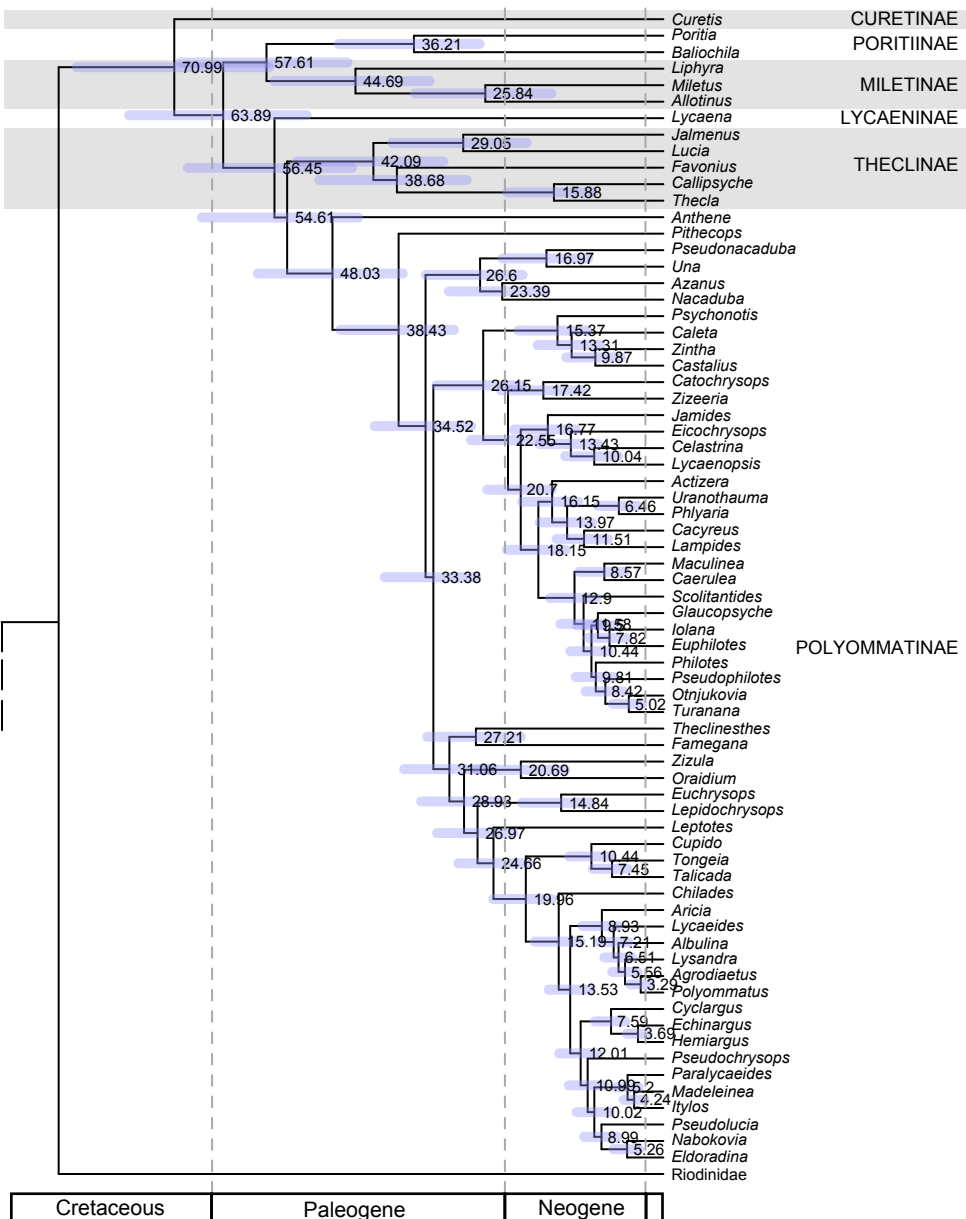

LYCAENIDAE

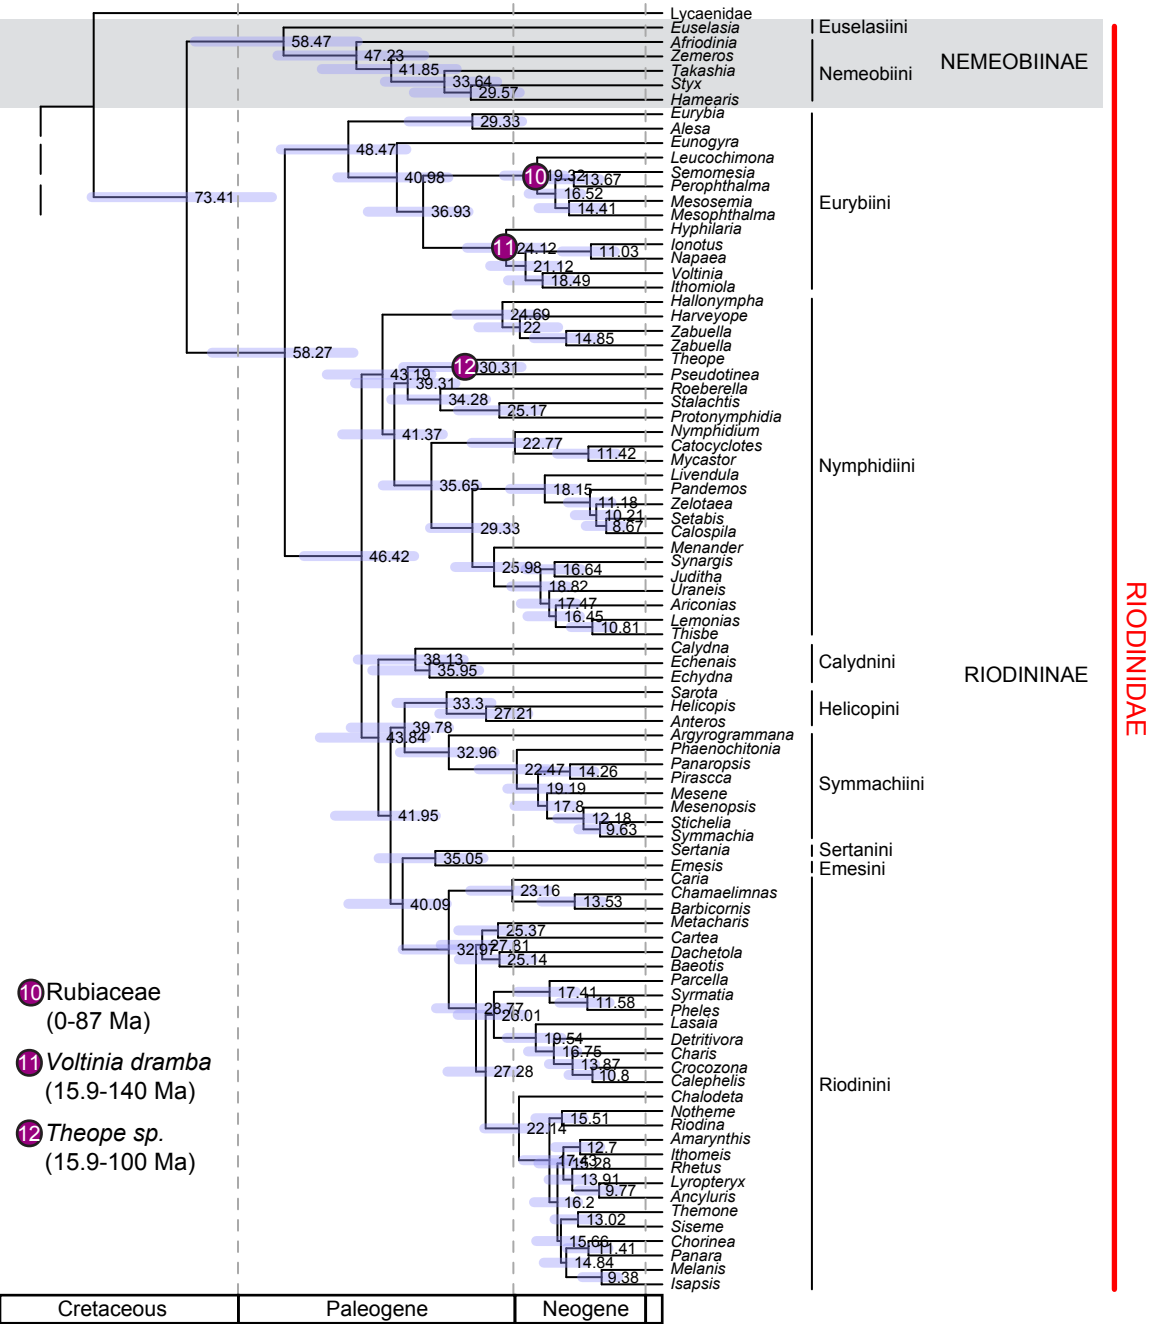

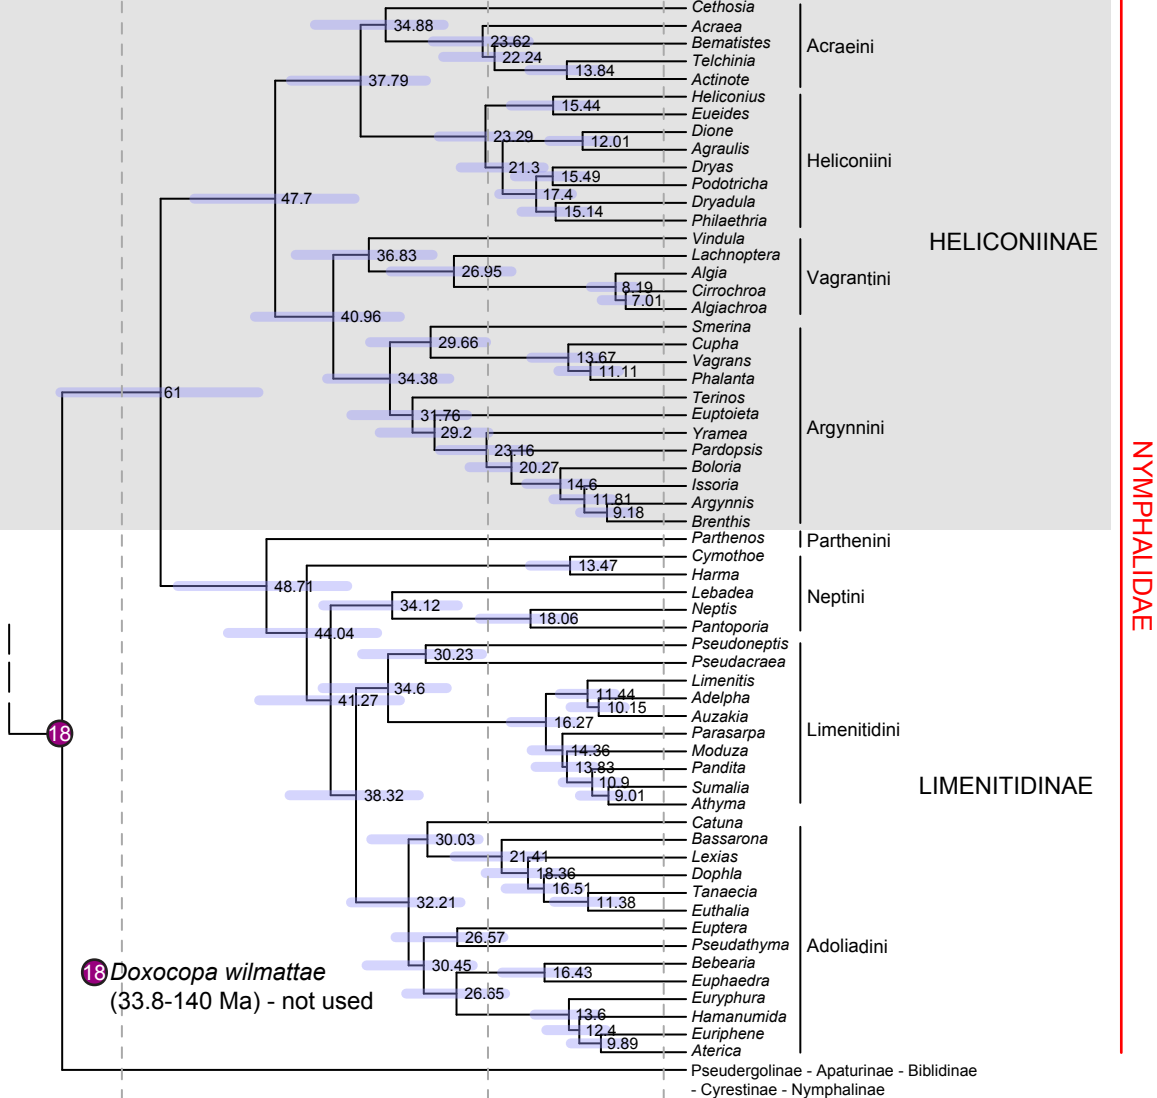

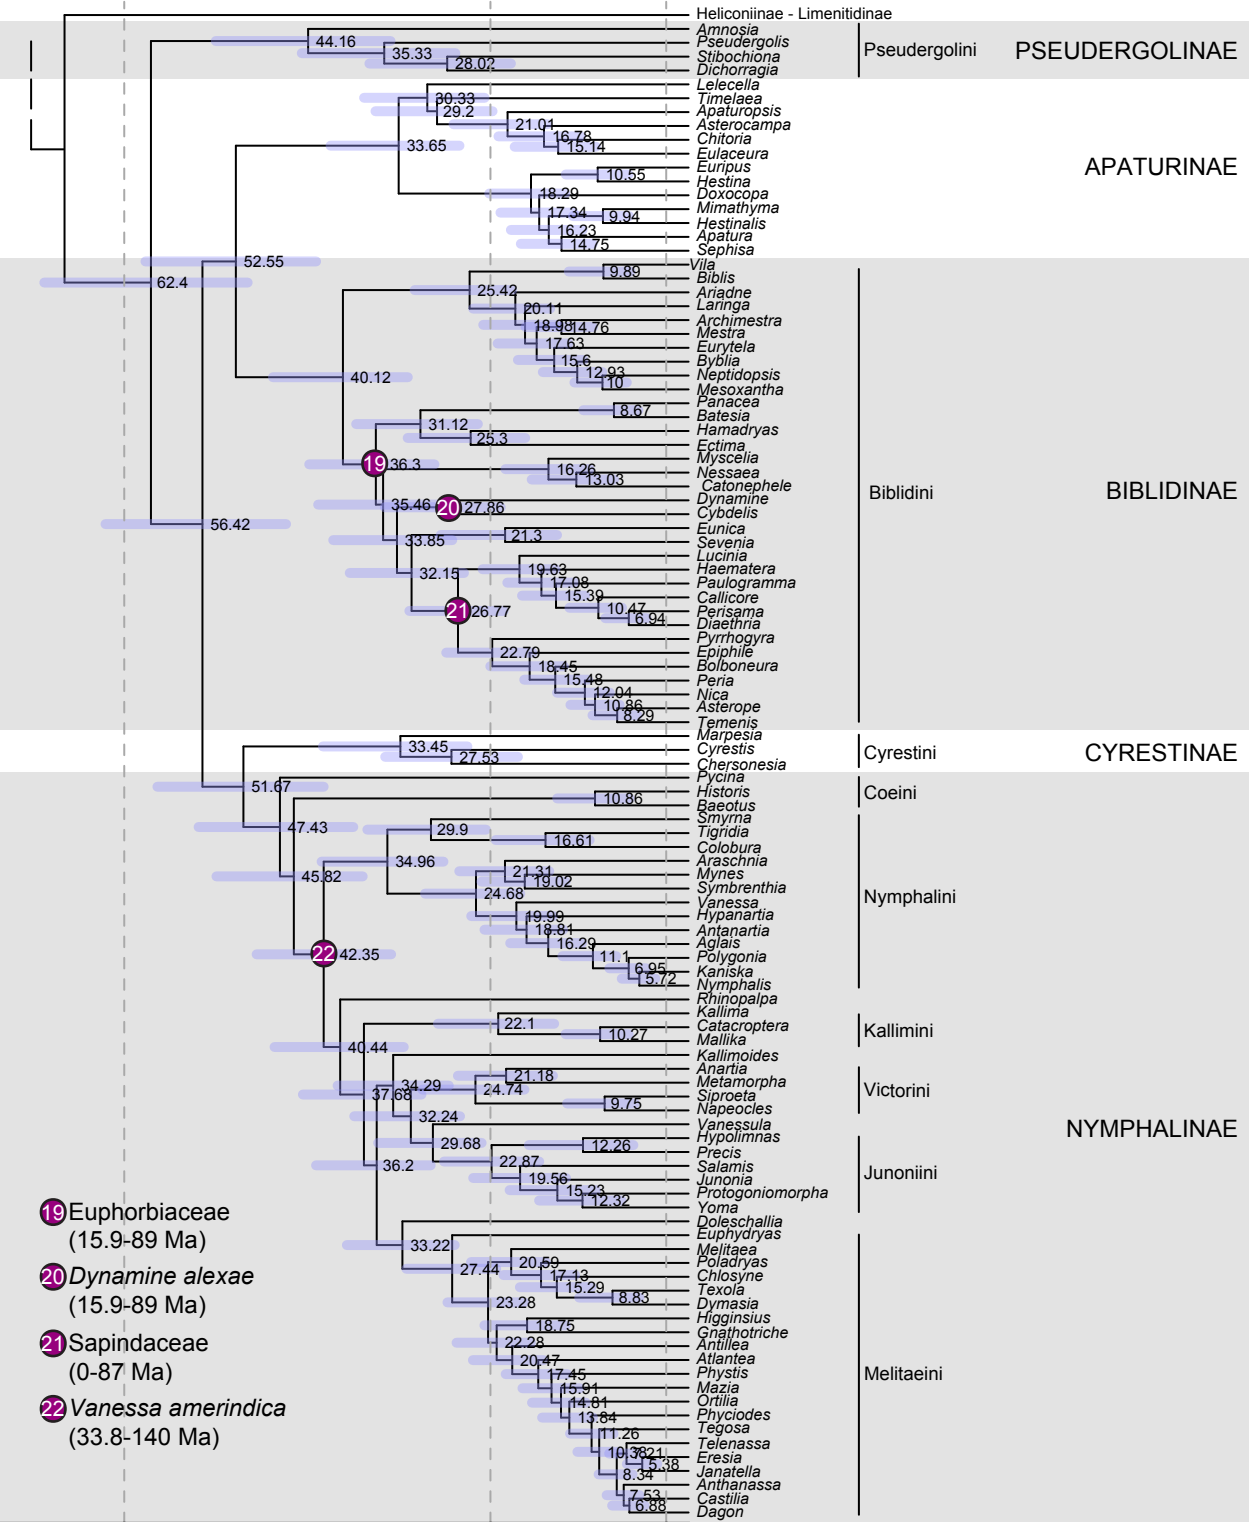

NYMPHALIDAE



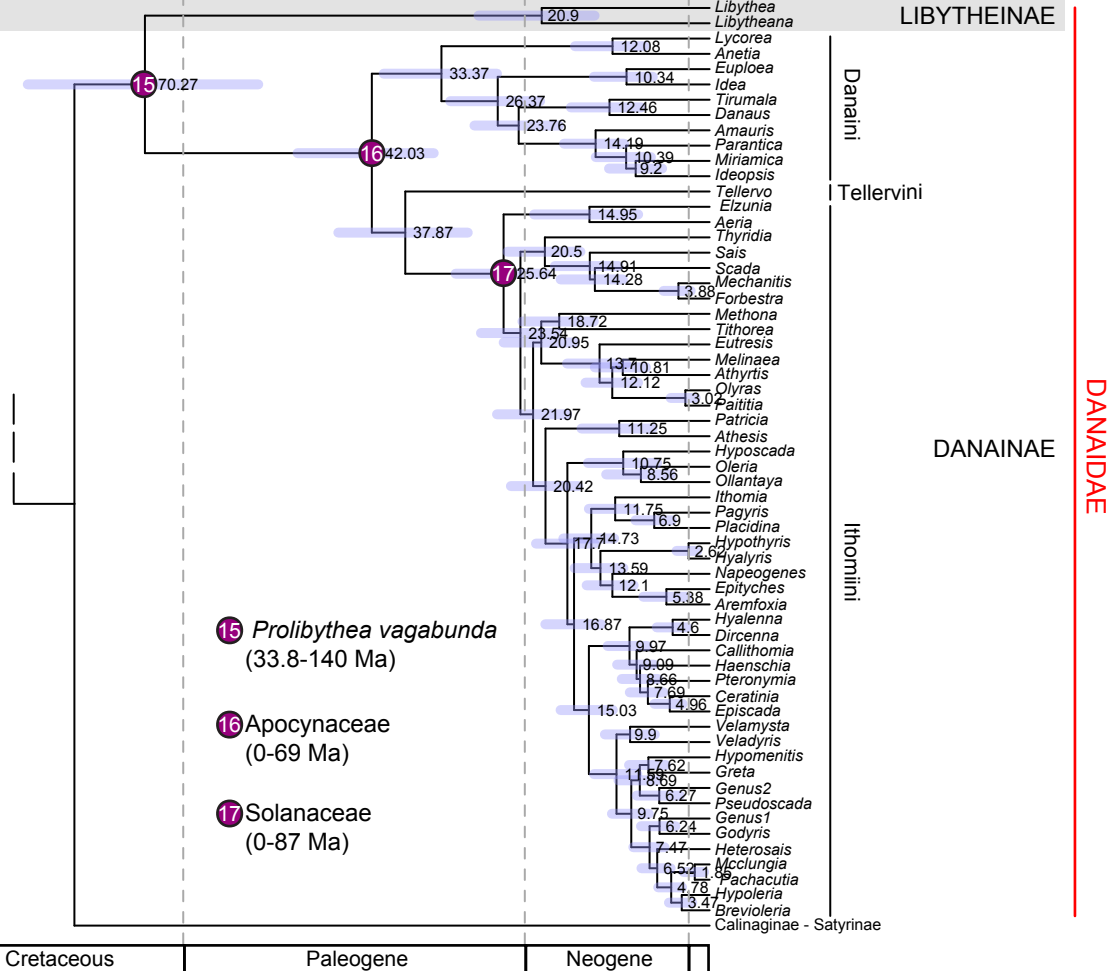

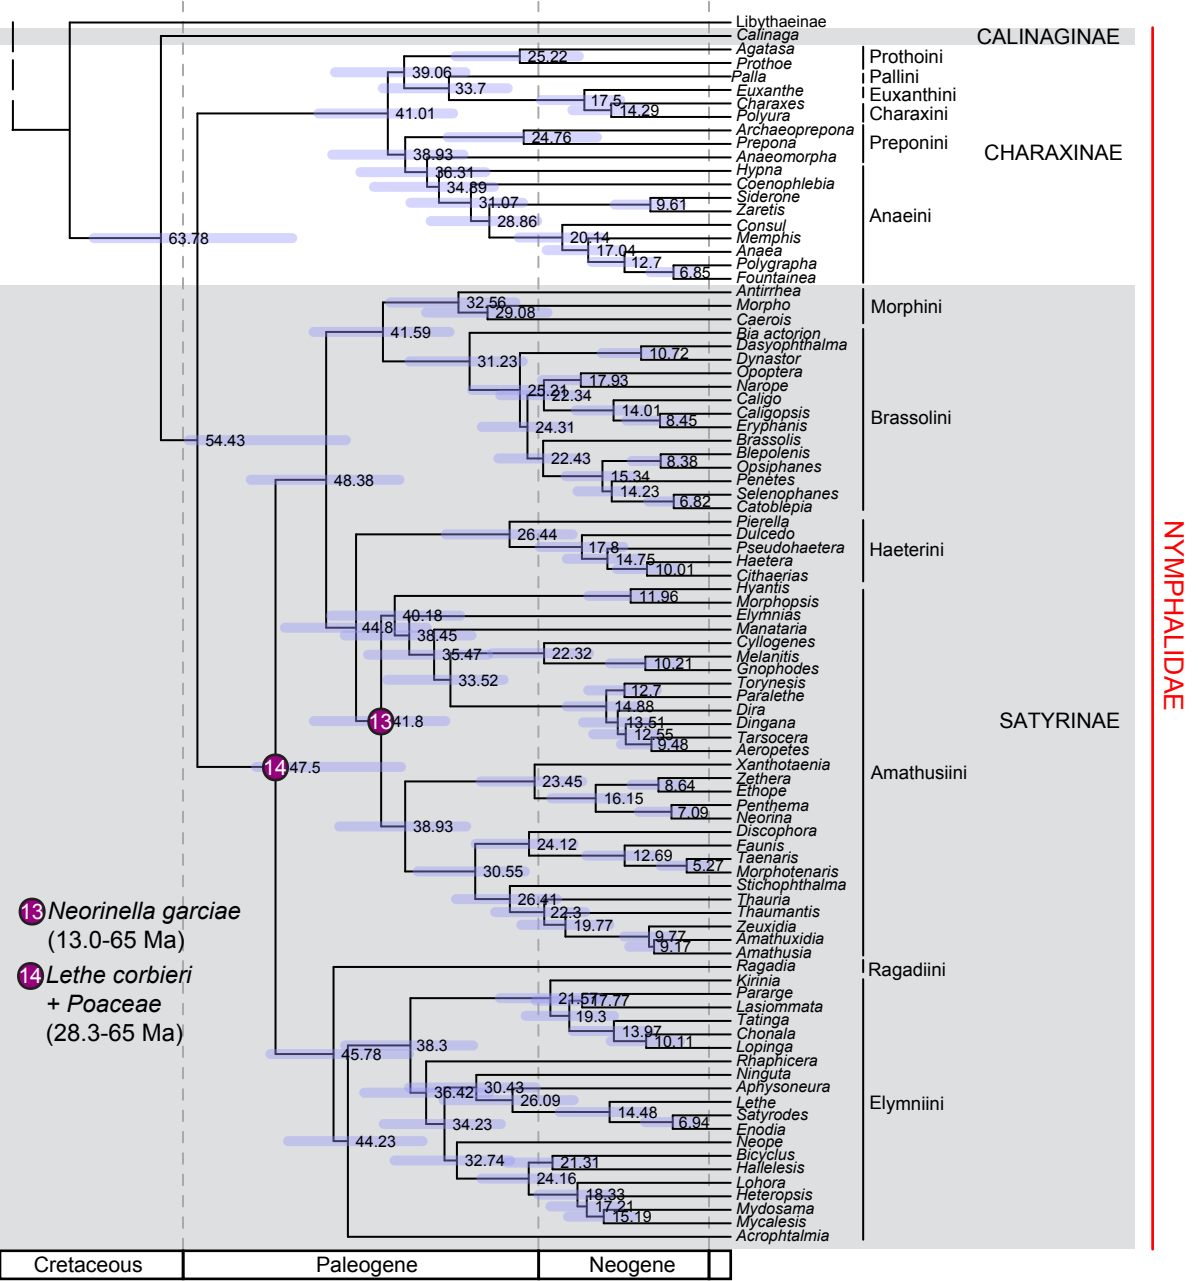

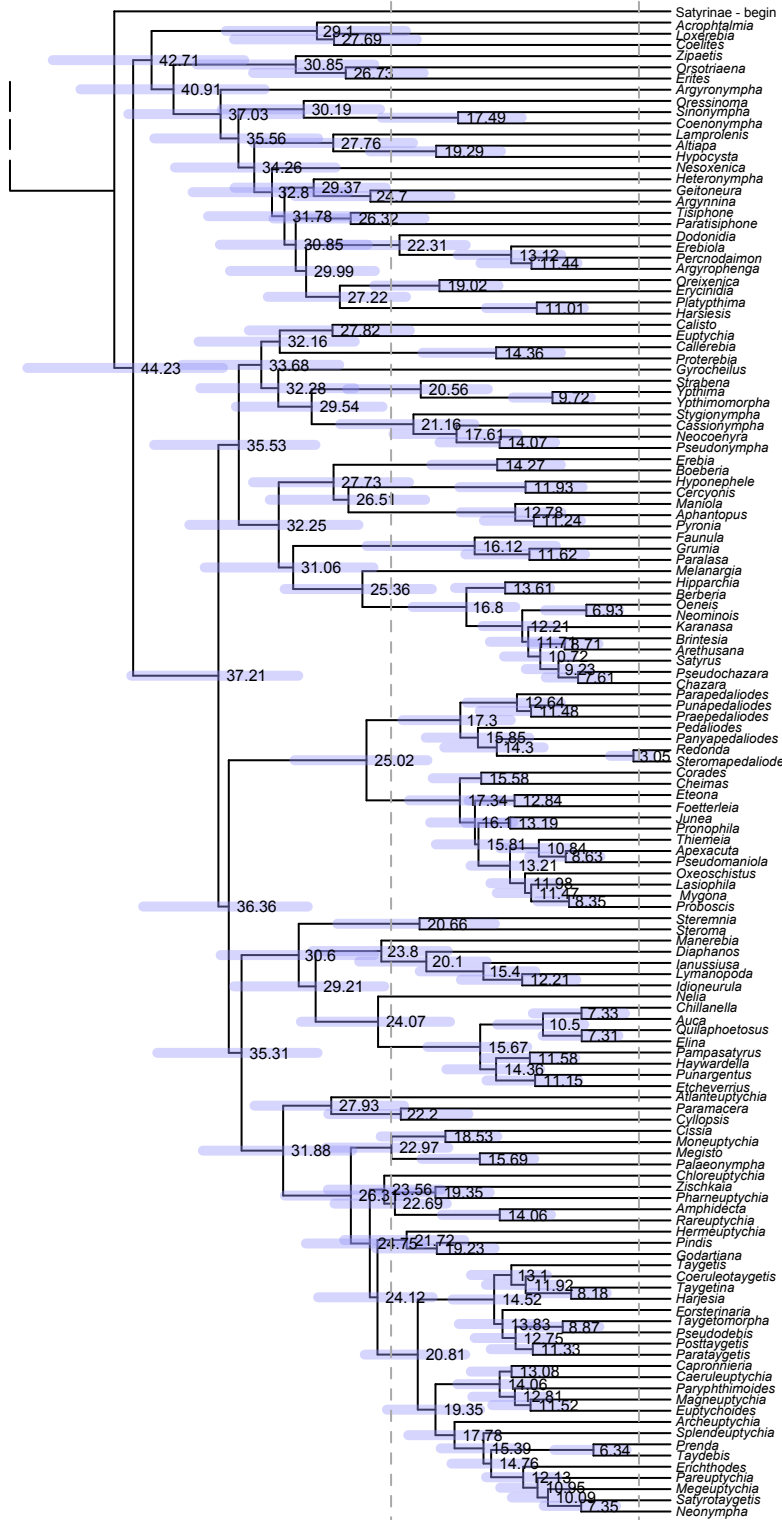

SATYRINAE

Satyriini

NYMPHALIDAE

Paleogene

Neogene

- Satyrinae - begin
- Acroptalmia
- Loxeribia
- Cyclitis
- Zipaeis
- Orsotriaena
- Erites
- Argyronympha
- Oressinoma
- Sinonympha
- Coenonympha
- Lamprolenis
- Alliapa
- Hypocysta
- Nesoxenica
- Heteronympha
- Geitoneura
- Argynnina
- Tisiphone
- Paratiphone
- Dodonidia
- Erebiola
- Pericardaimon
- Argyrotaenga
- Oreixenica
- Erycinidia
- Platyphima
- Harsiesis
- Callisto
- Euptychia
- Callerebia
- Proterebia
- Gyrochellus
- Stribena
- Ypthima
- Ypthimomorpha
- Skygionympha
- Cassioinympha
- Neocoenytra
- Pseudonympha
- Erebia
- Boeberia
- Hyponephele
- Cercyonis
- Maniola
- Aphantopus
- Pyronia
- Faunula
- Grumia
- Paralasa
- Melanargia
- Hipparchia
- Berberia
- Oenis
- Neominois
- Karanasa
- Euritesia
- Arethusana
- Satyrus
- Pseudochazara
- Chazara
- Parapedaliodes
- Punapedaliodes
- Praspedaliodes
- Pedaliodes
- Panyapedaliodes
- Redonia
- Steromapedaliodes
- Corades
- Cheimas
- Eteona
- Foetterleia
- Junea
- Pronophila
- Thiermeia
- Apexacuta
- Pseudomaniola
- Oxeoschistus
- Lasiophila
- Myiopa
- Proboscis
- Steremnia
- Steroma
- Manerobia
- Diaphanos
- Ianussiusa
- Lymnophoda
- Idioneurula
- Nelia
- Chilianella
- Auca
- Quilaphoetusus
- Elna
- Lampasatyrus
- Haywardella
- Punargentus
- Echeverrius
- Atlanteuptychia
- Paramacera
- Cyllopsis
- Cissia
- Moneuptychia
- Megisto
- Palaeonympha
- Chloreuptychia
- Zischkaia
- Pharneuptychia
- Amphidecta
- Rareuptychia
- Hermieuptychia
- Pindis
- Godartiana
- Taygetis
- Caeuleotaygetis
- Taygetina
- Hartesja
- Erclesinaria
- Taygetomorpha
- Pseudodebis
- Postaygetis
- Parataygetis
- Capronifleria
- Caeuleuptychia
- Parythimoides
- Magneuptychia
- Euptychoides
- Archneuptychia
- Splendeuptychia
- Prenda
- Taydebis
- Erichthodes
- Paruptychia
- Megeuptychia
- Satyrotaygetis
- Neonympha

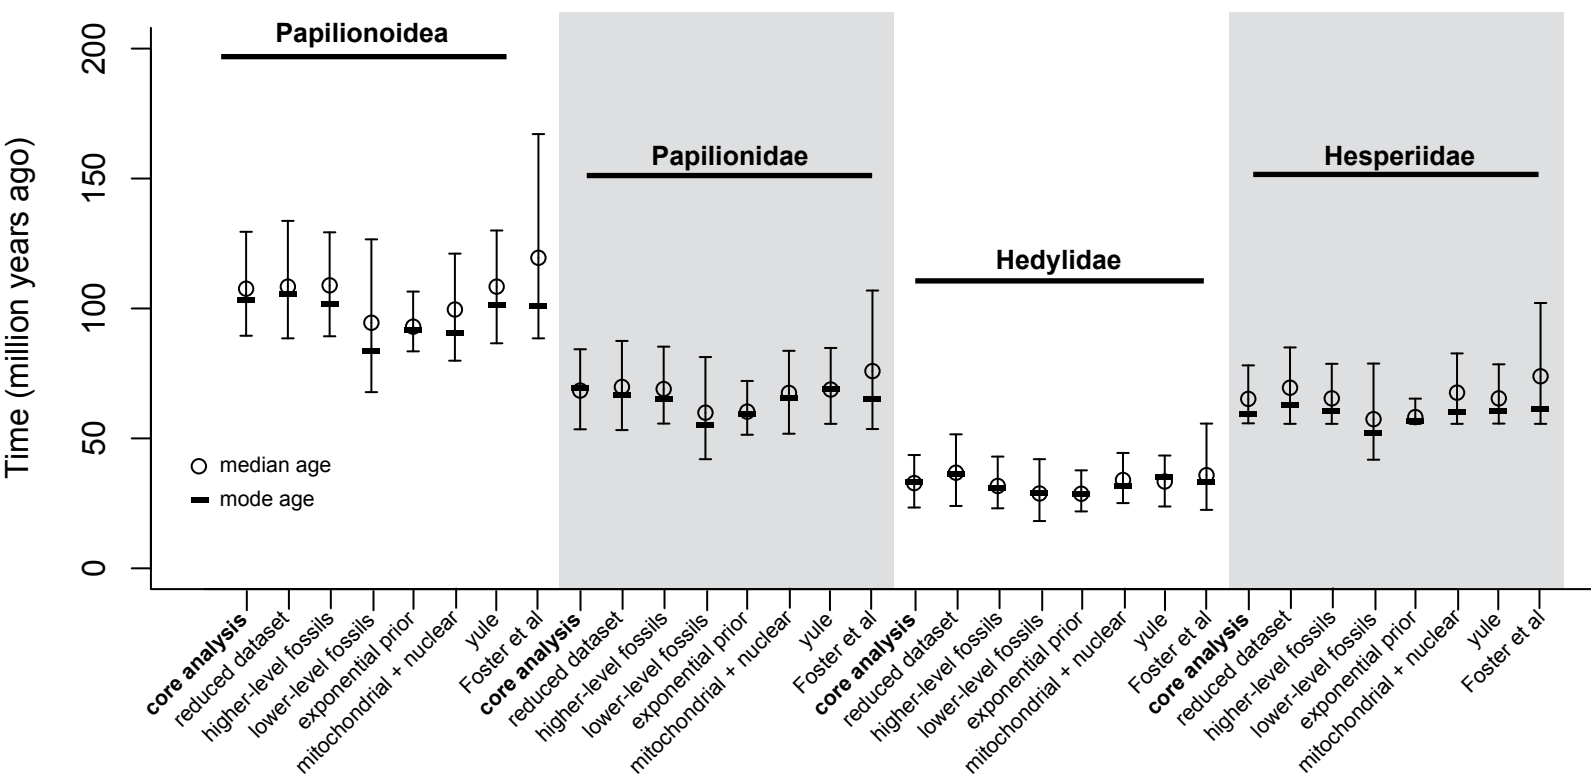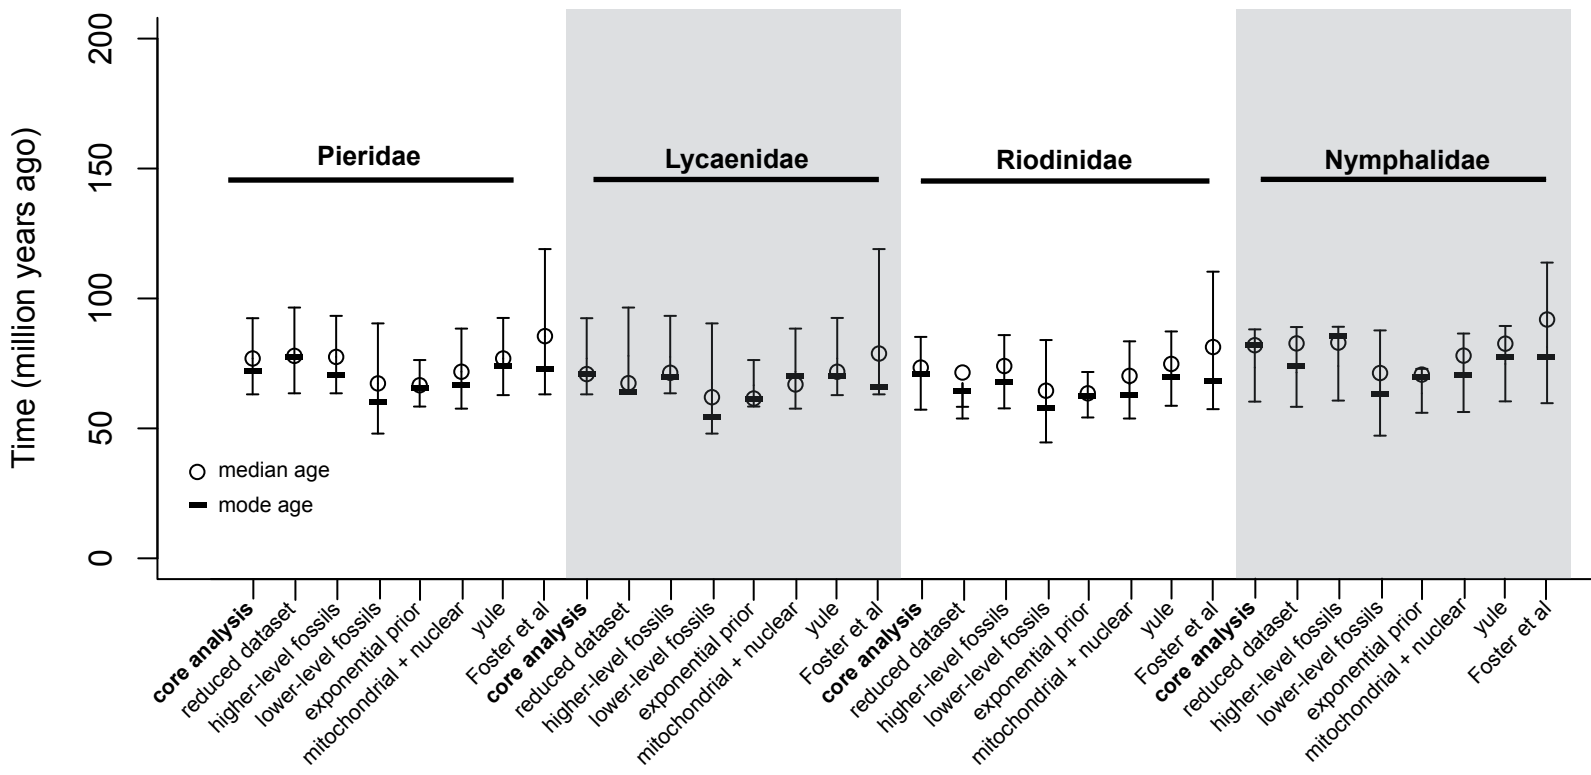

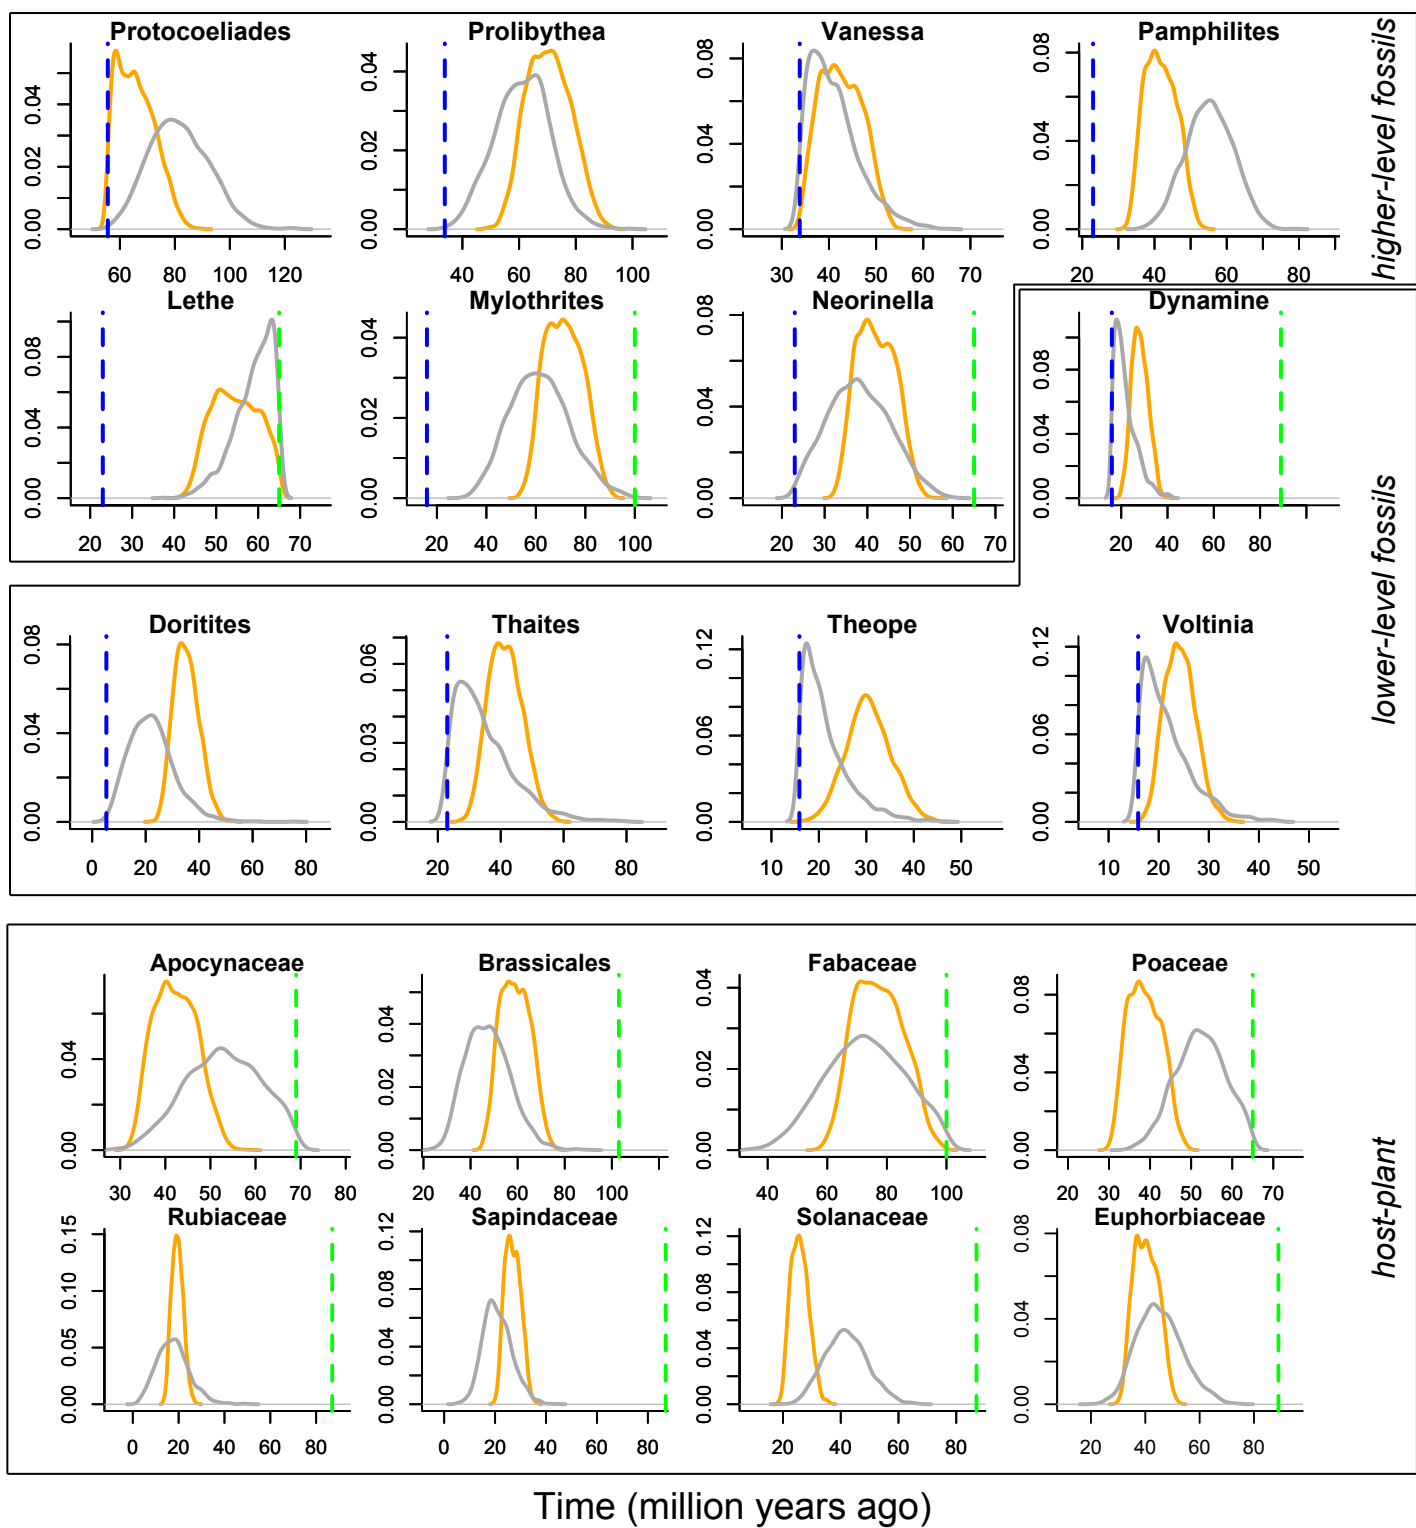

— posterior distribution

— marginal prior distribution

— maximum constraint

— minimum constraint

a)

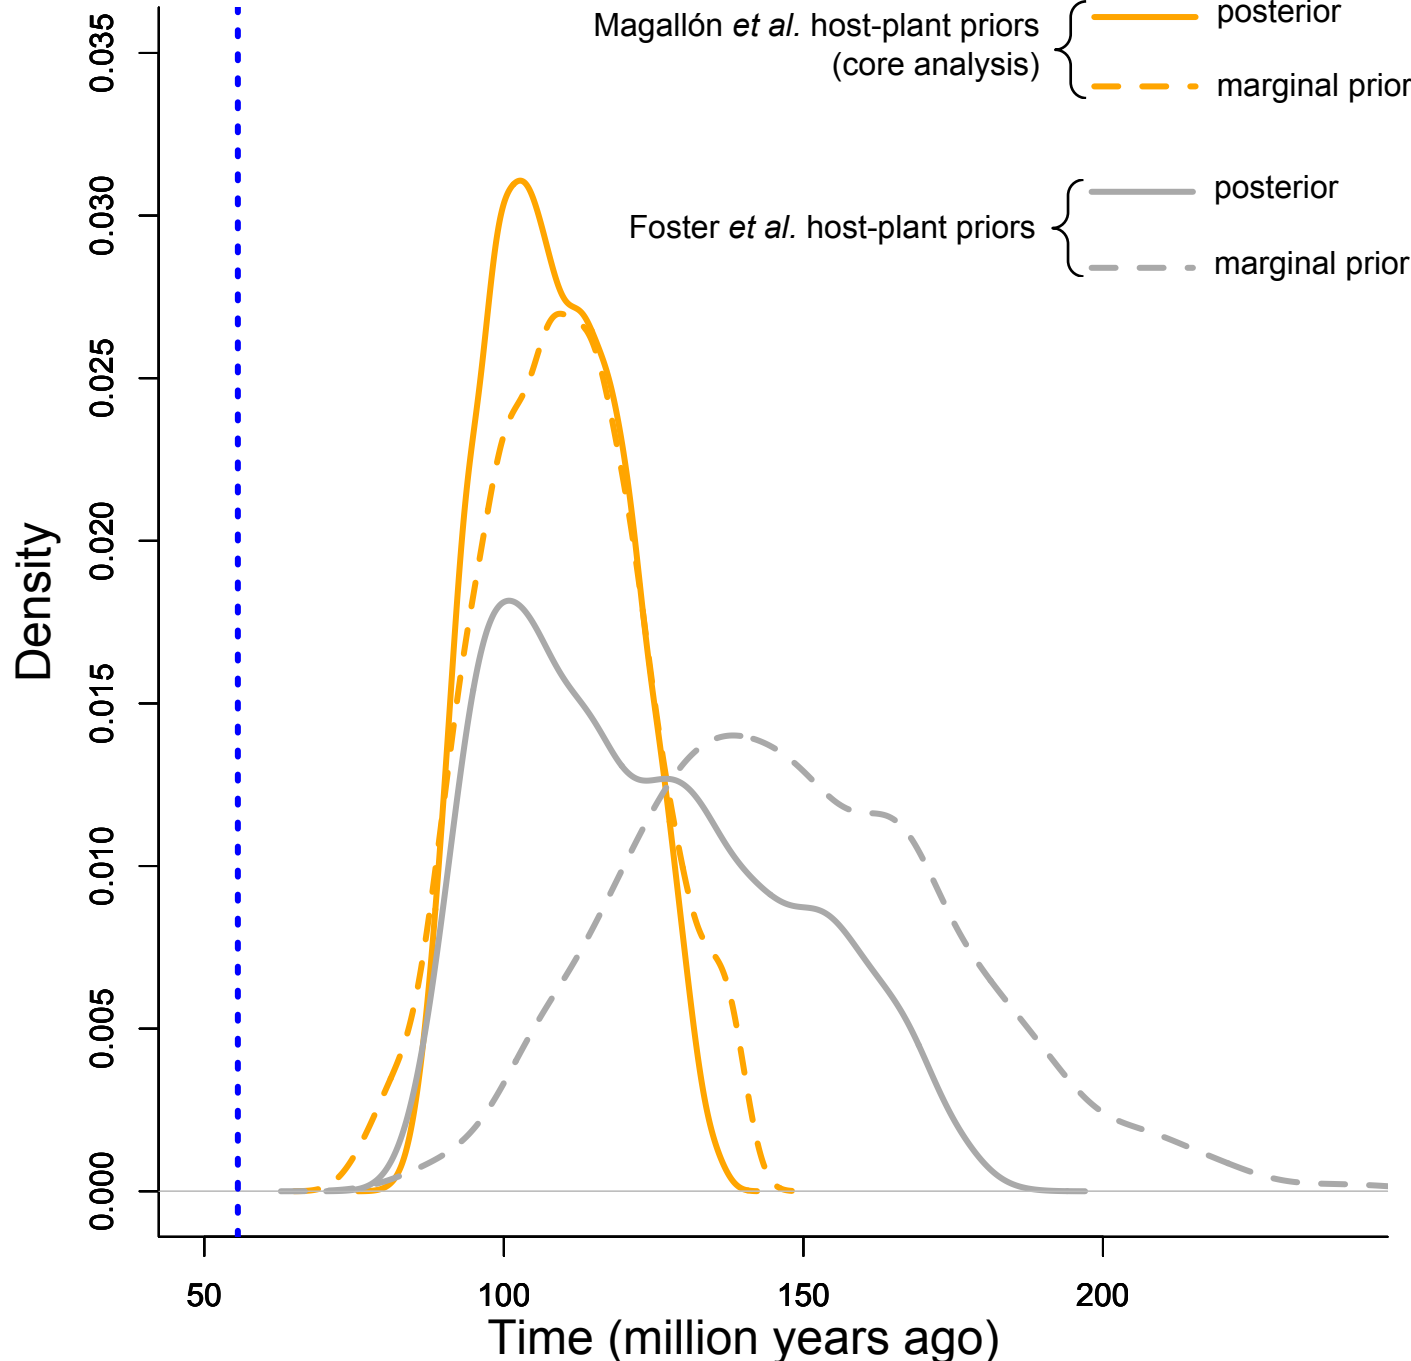

b)

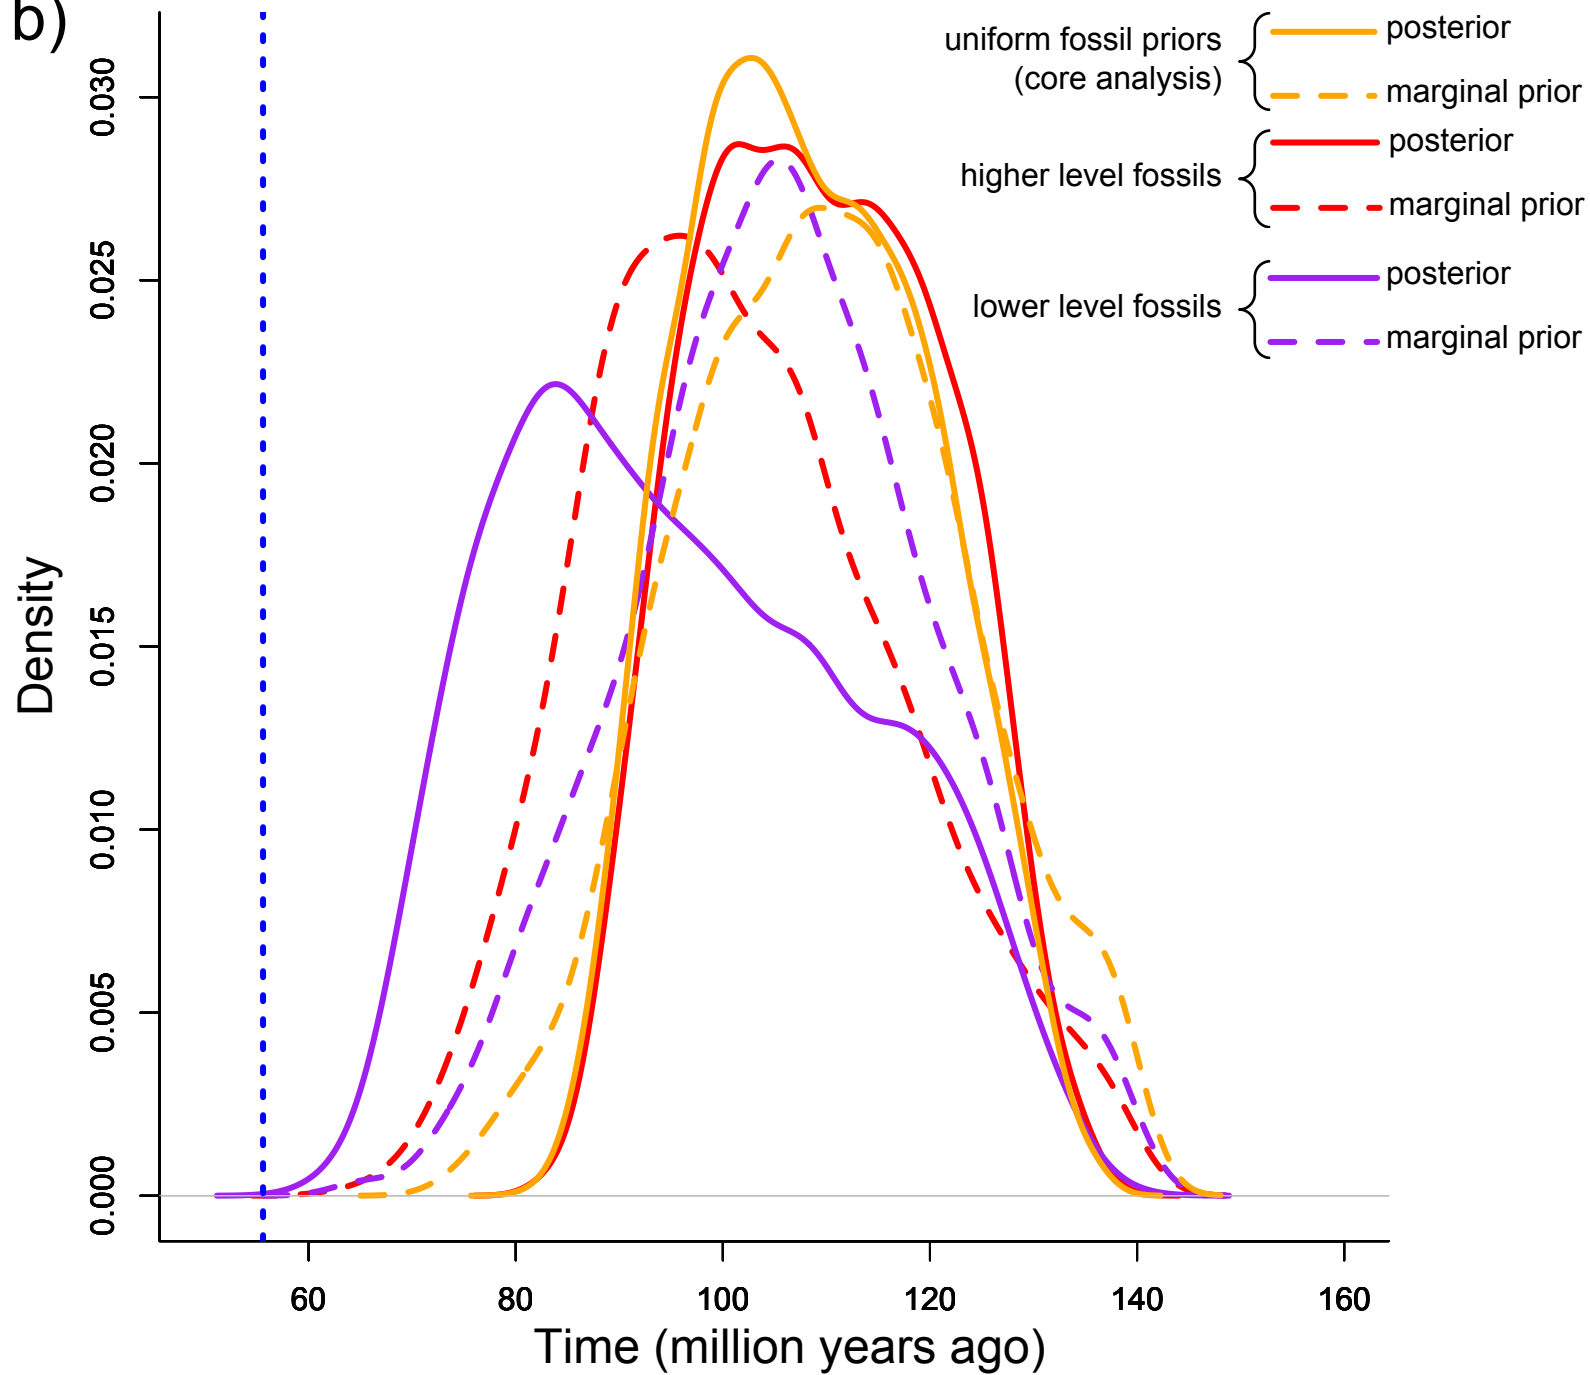

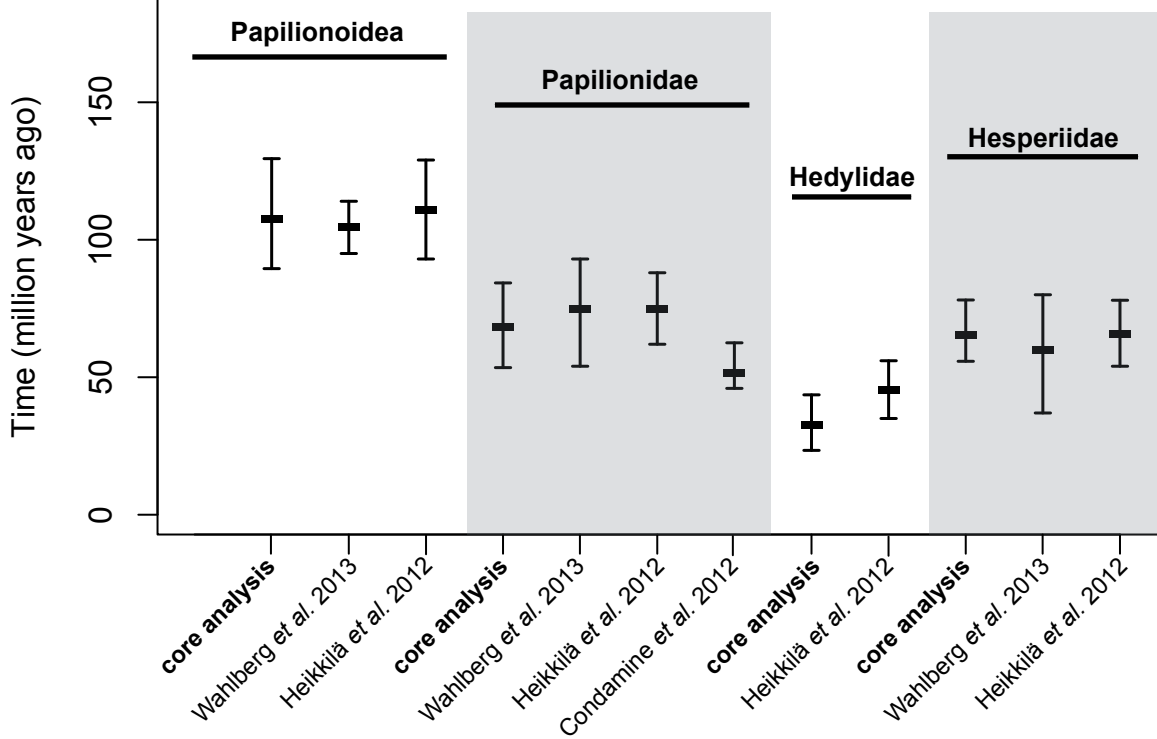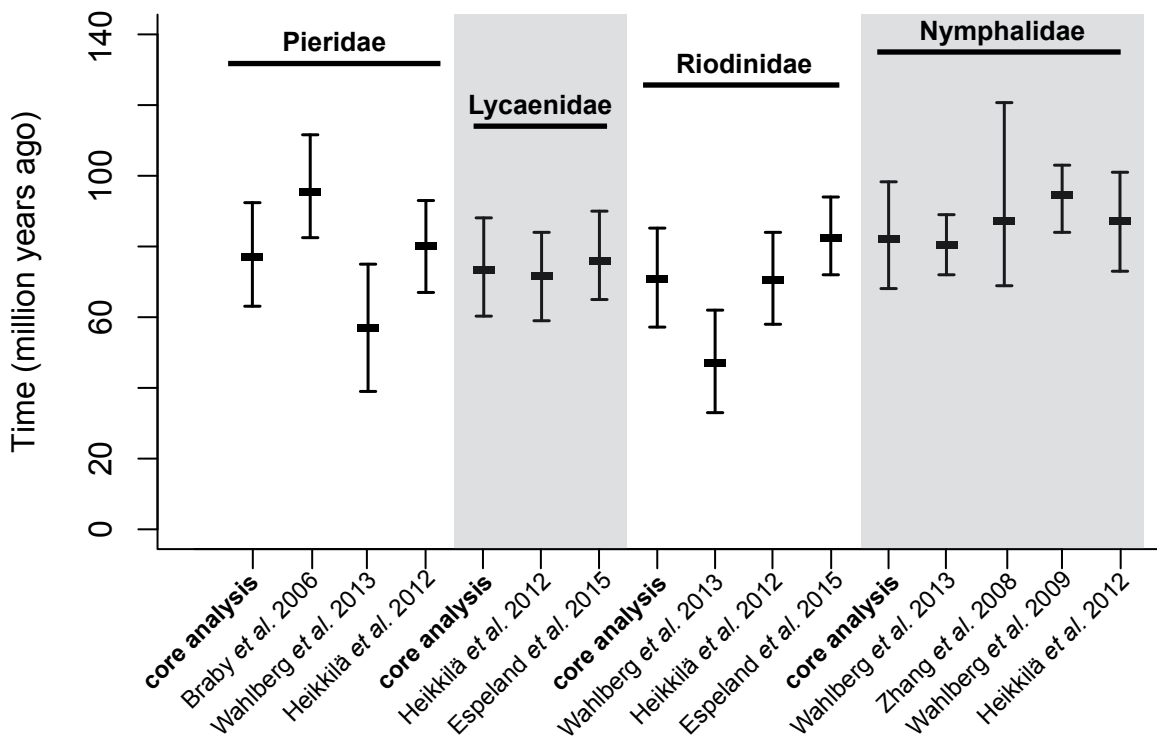

Source: https://www.biorxiv.org/content/10.1101/259184v1.full.pdf
